# Supplementary material for: Sex Differences in Fatty Acid Composition of Chinese Tongue Sole (Cynoglossus semilaevis) Tissues
Source: MDPI journal article supplement (doi:10.3390/fishes8080421), 2023-08-17
Supplement: s1 [file s1]

**Table S1.** Physical indices and total lipid content of liver, muscle and gonad in five batches of Chinese tongue sole (mean  $\pm$  standard error).

| Parameter   | HD                              |                                  |                               | RZ                            |                                |                                | WF1                            |                                |                               | WF2                             |                                 | WF3                            |                               |                               |
|-------------|---------------------------------|----------------------------------|-------------------------------|-------------------------------|--------------------------------|--------------------------------|--------------------------------|--------------------------------|-------------------------------|---------------------------------|---------------------------------|--------------------------------|-------------------------------|-------------------------------|
|             | F <sup>1</sup> (n=5)            | P (n=18)                         | M (n=6)                       | F(n=7)                        | P (n=6)                        | M (n=17)                       | F (n=8)                        | P (n=13)                       | M (n=9)                       | F (n=10)                        | P (n=9)                         | M (n=11)                       | F (n=25)                      | M (n=3)                       |
| BW          | 158.74 $\pm$ 25.80 <sup>a</sup> | 125.45 $\pm$ 13.91 <sup>ab</sup> | 75.31 $\pm$ 4.79 <sup>b</sup> | 138.22 $\pm$ 7.3 <sup>a</sup> | 115.33 $\pm$ 7.56 <sup>b</sup> | 100.71 $\pm$ 2.30 <sup>b</sup> | 219.84 $\pm$ 15.7 <sup>a</sup> | 146.94 $\pm$ 7.53 <sup>b</sup> | 143.67 $\pm$ 6.7 <sup>b</sup> | 264.34 $\pm$ 35.23 <sup>a</sup> | 169.86 $\pm$ 12.19 <sup>b</sup> | 155.44 $\pm$ 7.80 <sup>b</sup> | 154.91 $\pm$ 5.63             | 170.11 $\pm$ 3.74             |
| BL          | 28.20 $\pm$ 1.30 <sup>a</sup>   | 26.92 $\pm$ 0.90 <sup>ab</sup>   | 23.17 $\pm$ 0.41 <sup>b</sup> | 27.97 $\pm$ 0.8 <sup>a</sup>  | 26.30 $\pm$ 0.57 <sup>ab</sup> | 25.18 $\pm$ 0.23 <sup>b</sup>  | 31.76 $\pm$ 1.01 <sup>a</sup>  | 28.48 $\pm$ 0.44 <sup>b</sup>  | 27.93 $\pm$ 0.46 <sup>b</sup> | 33.88 $\pm$ 1.52 <sup>a</sup>   | 29.84 $\pm$ 0.51 <sup>b</sup>   | 28.16 $\pm$ 0.43 <sup>b</sup>  | 28.5 $\pm$ 0.28               | 29.2 $\pm$ 0.42               |
| LW          | 2.22 $\pm$ 0.47                 | 1.89 $\pm$ 0.26                  | 1.16 $\pm$ 0.16               | 1.75 $\pm$ 0.17               | 1.57 $\pm$ 0.17                | 1.53 $\pm$ 0.07                | 2.45 $\pm$ 0.29                | 2.93 $\pm$ 0.26                | 2.79 $\pm$ 0.24               | 2.57 $\pm$ 0.34                 | 2.29 $\pm$ 0.24                 | 1.95 $\pm$ 0.17                | 1.58 $\pm$ 0.09               | 2.07 $\pm$ 0.18               |
| CF          | 0.68 $\pm$ 0.03                 | 0.60 $\pm$ 0.02                  | 0.60 $\pm$ 0.01               | 0.63 $\pm$ 0.03               | 0.63 $\pm$ 0.03                | 0.63 $\pm$ 0.02                | 0.69 $\pm$ 0.05                | 0.63 $\pm$ 0.02                | 0.66 $\pm$ 0.02               | 0.65 $\pm$ 0.02                 | 0.63 $\pm$ 0.03                 | 0.69 $\pm$ 0.03                | 0.66 $\pm$ 0.01               | 0.69 $\pm$ 0.04               |
| HSI         | 1.36 $\pm$ 0.09                 | 1.44 $\pm$ 0.06                  | 1.51 $\pm$ 0.14               | 1.28 $\pm$ 0.15               | 1.36 $\pm$ 0.13                | 1.52 $\pm$ 0.06                | 1.11 $\pm$ 0.08 <sup>a</sup>   | 2.01 $\pm$ 0.17 <sup>b</sup>   | 2.21 $\pm$ 0.32 <sup>b</sup>  | 0.97 $\pm$ 0.03 <sup>a</sup>    | 1.33 $\pm$ 0.07 <sup>b</sup>    | 1.26 $\pm$ 0.09 <sup>b</sup>   | 1.02 $\pm$ 0.05               | 1.21 $\pm$ 0.08               |
| Total lipid |                                 |                                  |                               |                               |                                |                                |                                |                                |                               |                                 |                                 |                                |                               |                               |
| Liver       | 13.28 $\pm$ 0.33 <sup>a</sup>   | 17.18 $\pm$ 0.69 <sup>b</sup>    | 14.17 $\pm$ 0.38 <sup>a</sup> | 31.33 $\pm$ 1.19              | 30.79 $\pm$ 1.28               | 34.56 $\pm$ 0.67               | 25.29 $\pm$ 0.66               | 26.01 $\pm$ 0.59               | 22.74 $\pm$ 1.01              | 26.26 $\pm$ 0.64                | 25.00 $\pm$ 0.97                | 26.34 $\pm$ 0.88               | 24.99 $\pm$ 1.35              | 24.85 $\pm$ 0.59              |
| Muscle      | 3.70 $\pm$ 0.18                 | 3.78 $\pm$ 0.10                  | 3.84 $\pm$ 0.31               | 3.45 $\pm$ 0.08               | 3.46 $\pm$ 0.11                | 3.44 $\pm$ 0.07                | 2.71 $\pm$ 0.08 <sup>a</sup>   | 3.35 $\pm$ 0.06 <sup>b</sup>   | 3.06 $\pm$ 0.10 <sup>ab</sup> | 3.25 $\pm$ 0.02                 | 3.31 $\pm$ 0.15                 | 3.34 $\pm$ 0.15                | 2.60 $\pm$ 0.02               | 2.64 $\pm$ 0.04               |
| Gonad       |                                 |                                  |                               | 28.35 $\pm$ 2.07              | 28.06 $\pm$ 6.62               | 30.31 $\pm$ 1.05               | 10.65 $\pm$ 0.41 <sup>a</sup>  | 18.29 $\pm$ 1.37 <sup>b</sup>  | 22.62 $\pm$ 20 <sup>c</sup>   | 19.40 $\pm$ 0.32 <sup>a</sup>   | 21.76 $\pm$ 0.36 <sup>b</sup>   | 22.77 $\pm$ 0.49 <sup>b</sup>  | 18.99 $\pm$ 0.31 <sup>a</sup> | 22.06 $\pm$ 0.57 <sup>b</sup> |

<sup>1</sup> F, P, and M represents female, pseudomale, and male, respectively.

<sup>2</sup> Data within the same row and within a same fish batch not sharing a superscript letter were significantly ( $P<0.05$ ) different.

<sup>3</sup> “n” in the parentheses indicate the fish number of each batch.

<sup>4</sup> There was not enough pseudomale in WF3 for the fatty acid analysis.

<sup>5</sup> BW, body weight; BL, body length; LW, liver weight; CF, condition factor; HSI, hepatosomatic index.

**Table S2.** The brain fatty acid composition of experimental fish (%TFA, mean  $\pm$  standard error).

<sup>1</sup> F, P, and M represents female, pseudomale, and male, respectively.

| Fatty acid       | HD                            |                               |                               | RZ                             |                                |                               | WF1                           |                                |                               | WF2                          |                               |                              | WF3              |                  |
|------------------|-------------------------------|-------------------------------|-------------------------------|--------------------------------|--------------------------------|-------------------------------|-------------------------------|--------------------------------|-------------------------------|------------------------------|-------------------------------|------------------------------|------------------|------------------|
|                  | F                             | P                             | M                             | F                              | P                              | M                             | F                             | P                              | M                             | F                            | P                             | M                            | F                | M                |
| 14:0             | 0.75 $\pm$ 0.03               | 0.78 $\pm$ 0.06               | 0.87 $\pm$ 0.06               | 0.98 $\pm$ 0.17                | 0.99 $\pm$ 0.09                | 0.85 $\pm$ 0.02               | 0.71 $\pm$ 0.10               | 0.79 $\pm$ 0.11                | 0.87 $\pm$ 0.07               | 0.63 $\pm$ 0.02              | 0.64 $\pm$ 0.03               | 0.65 $\pm$ 0.03              | 0.69 $\pm$ 0.01  | 0.76 $\pm$ 0.04  |
| 16:0             | 16.82 $\pm$ 0.02 <sup>a</sup> | 15.83 $\pm$ 0.02 <sup>b</sup> | 15.68 $\pm$ 0.39 <sup>b</sup> | 17.34 $\pm$ 0.30 <sup>a</sup>  | 16.56 $\pm$ 0.15 <sup>ab</sup> | 15.81 $\pm$ 0.24 <sup>b</sup> | 16.57 $\pm$ 0.30              | 16.42 $\pm$ 0.15               | 16.74 $\pm$ 0.33              | 15.79 $\pm$ 0.31             | 16.83 $\pm$ 0.16              | 16.32 $\pm$ 0.43             | 15.1 $\pm$ 0.34  | 15.85 $\pm$ 0.24 |
| 18:0             | 11.30 $\pm$ 0.07              | 11.21 $\pm$ 0.15              | 10.91 $\pm$ 0.53              | 11.43 $\pm$ 0.38               | 11.15 $\pm$ 0.73               | 10.37 $\pm$ 0.78              | 13.02 $\pm$ 0.76              | 12.69 $\pm$ 0.21               | 12.58 $\pm$ 0.57              | 13.29 $\pm$ 0.32             | 13.7 $\pm$ 0.20               | 12.99 $\pm$ 0.39             | 12.05 $\pm$ 0.21 | 11.49 $\pm$ 0.21 |
| $\Sigma$ SFA     | 28.87 $\pm$ 0.06              | 27.82 $\pm$ 0.18              | 27.47 $\pm$ 0.84              | 29.75 $\pm$ 0.22 <sup>a</sup>  | 28.70 $\pm$ 0.60 <sup>ab</sup> | 27.03 $\pm$ 1.00 <sup>b</sup> | 30.30 $\pm$ 0.78              | 29.90 $\pm$ 0.30               | 30.19 $\pm$ 0.76              | 29.71 $\pm$ 0.60             | 31.17 $\pm$ 0.33              | 29.95 $\pm$ 0.84             | 27.85 $\pm$ 0.41 | 28.10 $\pm$ 0.40 |
| 16:1 $n$ -7      | 2.75 $\pm$ 0.13               | 2.67 $\pm$ 0.14               | 2.91 $\pm$ 0.33               | 2.12 $\pm$ 0.35                | 2.15 $\pm$ 0.30                | 2.75 $\pm$ 0.08               | 1.54 $\pm$ 0.24               | 1.57 $\pm$ 0.17                | 1.58 $\pm$ 0.09               | 1.09 $\pm$ 0.05 <sup>a</sup> | 1.24 $\pm$ 0.05 <sup>ab</sup> | 1.38 $\pm$ 0.06 <sup>b</sup> | 1.39 $\pm$ 0.09  | 1.65 $\pm$ 0.14  |
| 17:1 $n$ -7      | 1.16 $\pm$ 0.01               | 1.20 $\pm$ 0.03               | 1.25 $\pm$ 0.04               | 1.14 $\pm$ 0.09                | 1.10 $\pm$ 0.07                | 1.21 $\pm$ 0.02               | 1.60 $\pm$ 0.04               | 1.42 $\pm$ 0.10                | 1.42 $\pm$ 0.08               | 1.40 $\pm$ 0.11              | 1.21 $\pm$ 0.03               | 1.27 $\pm$ 0.02              | 0.37 $\pm$ 0.04  | 0.39 $\pm$ 0.05  |
| 18:1 $n$ -9c     | 17.96 $\pm$ 0.62              | 18.50 $\pm$ 0.48              | 18.9 $\pm$ 0.51               | 17.96 $\pm$ 0.16 <sup>ab</sup> | 17.72 $\pm$ 0.53 <sup>a</sup>  | 19.61 $\pm$ 0.28 <sup>b</sup> | 20.92 $\pm$ 0.22 <sup>a</sup> | 19.1 $\pm$ 0.75 <sup>ab</sup>  | 18.7 $\pm$ 0.24 <sup>b</sup>  | 19.80 $\pm$ 0.85             | 18.91 $\pm$ 0.29              | 20.02 $\pm$ 0.66             | 19.7 $\pm$ 1.04  | 19.61 $\pm$ 0.32 |
| $\Sigma$ MUFA    | 21.87 $\pm$ 0.74              | 22.37 $\pm$ 0.59              | 23.06 $\pm$ 0.82              | 21.21 $\pm$ 0.36               | 20.97 $\pm$ 0.78               | 23.58 $\pm$ 0.35              | 24.06 $\pm$ 0.35 <sup>a</sup> | 22.08 $\pm$ 0.68 <sup>ab</sup> | 21.69 $\pm$ 0.25 <sup>b</sup> | 22.29 $\pm$ 0.99             | 21.35 $\pm$ 0.32              | 22.68 $\pm$ 0.68             | 21.47 $\pm$ 0.98 | 21.66 $\pm$ 0.42 |
| 18:2 $n$ -6c     | 1.60 $\pm$ 0.22               | 1.44 $\pm$ 0.13               | 1.59 $\pm$ 0.08               | 1.98 $\pm$ 0.63                | 2.91 $\pm$ 0.91                | 2.51 $\pm$ 0.97               | 5.50 $\pm$ 0.33               | 4.61 $\pm$ 0.10                | 5.00 $\pm$ 0.20               | 3.58 $\pm$ 0.14              | 3.86 $\pm$ 0.20               | 3.58 $\pm$ 0.23              | 5.51 $\pm$ 0.11  | 5.22 $\pm$ 0.18  |
| 20:4 $n$ -6      | 0.32 $\pm$ 0.05               | 0.26 $\pm$ 0.04               | 0.28 $\pm$ 0.05               | 0.25 $\pm$ 0.02 <sup>ab</sup>  | 0.22 $\pm$ 0.03 <sup>a</sup>   | 0.35 $\pm$ 0.01 <sup>b</sup>  | 0.25 $\pm$ 0.03               | 0.28 $\pm$ 0.03                | 0.20 $\pm$ 0.01               | 0.29 $\pm$ 0.02              | 0.22 $\pm$ 0.01               | 0.27 $\pm$ 0.01              | 0.23 $\pm$ 0.02  | 0.28 $\pm$ 0.06  |
| $\Sigma$ n-6PUFA | 1.92 $\pm$ 0.17               | 1.70 $\pm$ 0.10               | 1.87 $\pm$ 0.12               | 2.23 $\pm$ 0.61                | 3.14 $\pm$ 0.92                | 2.85 $\pm$ 0.96               | 5.75 $\pm$ 0.32               | 4.89 $\pm$ 0.13                | 5.20 $\pm$ 0.19               | 3.87 $\pm$ 0.16              | 4.07 $\pm$ 0.20               | 3.85 $\pm$ 0.23              | 5.74 $\pm$ 0.09  | 5.51 $\pm$ 0.21  |
| 20:3 $n$ -3      | 1.26 $\pm$ 0.08               | 1.43 $\pm$ 0.04               | 1.38 $\pm$ 0.06               | 1.48 $\pm$ 0.07                | 1.47 $\pm$ 0.07                | 1.62 $\pm$ 0.29               | 1.09 $\pm$ 0.02               | 1.27 $\pm$ 0.07                | 1.11 $\pm$ 0.02               | 1.41 $\pm$ 0.02              | 1.34 $\pm$ 0.03               | 1.36 $\pm$ 0.02              | 1.35 $\pm$ 0.04  | 1.41 $\pm$ 0.03  |
| 20:5 $n$ -3      | 5.77 $\pm$ 0.07               | 5.80 $\pm$ 0.15               | 5.64 $\pm$ 0.38               | 4.57 $\pm$ 0.13 <sup>a</sup>   | 5.53 $\pm$ 0.28 <sup>ab</sup>  | 5.63 $\pm$ 0.18 <sup>b</sup>  | 4.74 $\pm$ 0.33               | 4.39 $\pm$ 0.26                | 4.38 $\pm$ 0.19               | 4.11 $\pm$ 0.13              | 3.83 $\pm$ 0.16               | 4.00 $\pm$ 0.08              | 3.55 $\pm$ 0.13  | 3.64 $\pm$ 0.12  |
| 22:5 $n$ -3      | 2.10 $\pm$ 0.07               | 2.05 $\pm$ 0.16               | 1.91 $\pm$ 0.15               | 2.09 $\pm$ 0.04                | 2.21 $\pm$ 0.12                | 2.30 $\pm$ 0.10               | 2.06 $\pm$ 0.20               | 2.31 $\pm$ 0.15                | 1.83 $\pm$ 0.06               | 2.14 $\pm$ 0.11              | 1.96 $\pm$ 0.06               | 1.80 $\pm$ 0.11              | 1.60 $\pm$ 0.08  | 1.44 $\pm$ 0.11  |
| 22:6 $n$ -3      | 22.39 $\pm$ 0.48              | 23.57 $\pm$ 0.67              | 24.16 $\pm$ 0.08              | 24.67 $\pm$ 0.78               | 23.00 $\pm$ 1.88               | 21.29 $\pm$ 0.39              | 20.38 $\pm$ 0.97              | 20.18 $\pm$ 0.50               | 21.00 $\pm$ 0.39              | 20.94 $\pm$ 0.89             | 22.09 $\pm$ 0.74              | 20.74 $\pm$ 0.86             | 20.47 $\pm$ 0.76 | 20.74 $\pm$ 1.07 |
| $\Sigma$ n-3PUFA | 32.54 $\pm$ 1.01              | 32.85 $\pm$ 0.51              | 31.82 $\pm$ 0.93              | 32.8 $\pm$ 0.99                | 32.21 $\pm$ 1.76               | 30.84 $\pm$ 0.76              | 28.27 $\pm$ 0.45              | 28.14 $\pm$ 0.95               | 28.33 $\pm$ 0.28              | 28.60 $\pm$ 0.66             | 29.22 $\pm$ 0.57              | 27.89 $\pm$ 0.98             | 26.96 $\pm$ 0.97 | 27.24 $\pm$ 0.87 |

<sup>2</sup> Data within the same row and within a same fish batch not sharing a superscript letter were significantly ( $P < 0.05$ ) different.

<sup>3</sup> There was not enough pseudomale in WF3 for the fatty acid analysis.

<sup>4</sup> SFA, saturated fatty acids; MUFA, mono-unsaturated fatty acids; n-6PUFA, n-6 poly-unsaturated fatty acids; n-3 PUFA, n-3 poly-unsaturated fatty acid.

**Table S3.** The eye fatty acid composition of experimental fish (%TFA, mean  $\pm$  standard error).

| Fatty acid       | HD    |       |       | RZ                           |                              |                              | WF1                           |                               |                                | WF2               |                  |                  | WF3                          |                              |
|------------------|-------|-------|-------|------------------------------|------------------------------|------------------------------|-------------------------------|-------------------------------|--------------------------------|-------------------|------------------|------------------|------------------------------|------------------------------|
|                  | F     | P     | M     | F                            | P                            | M                            | F                             | P                             | M                              | F                 | P                | M                | F                            | M                            |
| 14:0             | 2.48  | 2.17  | 2.65  | 1.21 $\pm$ 0.17              | 1.26 $\pm$ 0.16              | 1.40 $\pm$ 0.24              | 1.41 $\pm$ 0.09               | 1.96 $\pm$ 0.28               | 1.72 $\pm$ 0.11                | 1.22 $\pm$ 0.14   | 1.46 $\pm$ 0.06  | 1.17 $\pm$ 0.07  | 0.73 $\pm$ 0.10              | 0.94 $\pm$ 0.17              |
| 16:0             | 16.79 | 16.59 | 17.17 | 15.42 $\pm$ 0.39             | 15.33 $\pm$ 0.68             | 15.07 $\pm$ 0.34             | 16.53 $\pm$ 0.49              | 16.77 $\pm$ 0.78              | 15.29 $\pm$ 0.33               | 16.67 $\pm$ 0.46  | 18.19 $\pm$ 0.26 | 18.58 $\pm$ 0.66 | 14.16 $\pm$ 0.81             | 15.91 $\pm$ 0.56             |
| 18:0             | 6.16  | 6.96  | 6.06  | 7.50 $\pm$ 0.09              | 7.58 $\pm$ 0.37              | 7.63 $\pm$ 0.45              | 8.25 $\pm$ 0.64               | 7.13 $\pm$ 0.29               | 7.19 $\pm$ 0.58                | 6.91 $\pm$ 0.19   | 6.80 $\pm$ 0.06  | 6.87 $\pm$ 0.41  | 7.36 $\pm$ 0.28              | 7.43 $\pm$ 0.21              |
| $\Sigma$ SFA     | 25.43 | 25.72 | 25.88 | 24.14 $\pm$ 0.39             | 24.16 $\pm$ 1.21             | 24.1 $\pm$ 0.29              | 26.19 $\pm$ 1.23              | 25.86 $\pm$ 0.90              | 24.20 $\pm$ 0.67               | 24.81 $\pm$ 0.45  | 26.45 $\pm$ 0.24 | 26.62 $\pm$ 1.01 | 22.24 $\pm$ 1.13             | 24.28 $\pm$ 0.84             |
| 16:1 $n$ -7      | 5.06  | 4.17  | 3.94  | 1.64 $\pm$ 0.12              | 1.82 $\pm$ 0.15              | 2.08 $\pm$ 0.18              | 1.68 $\pm$ 0.07               | 2.57 $\pm$ 0.23               | 2.22 $\pm$ 0.26                | 1.42 $\pm$ 0.17   | 1.46 $\pm$ 0.07  | 1.15 $\pm$ 0.05  | 0.97 $\pm$ 0.08              | 1.28 $\pm$ 0.22              |
| 18:1 $n$ -9c     | 10.07 | 10.09 | 10.50 | 9.08 $\pm$ 0.40              | 9.29 $\pm$ 0.98              | 9.49 $\pm$ 0.30              | 9.87 $\pm$ 0.30               | 11.29 $\pm$ 0.10              | 10.81 $\pm$ 0.72               | 8.71 $\pm$ 0.56   | 8.73 $\pm$ 0.21  | 7.42 $\pm$ 0.46  | 7.82 $\pm$ 0.30 <sup>a</sup> | 9.85 $\pm$ 0.61 <sup>b</sup> |
| $\Sigma$ MUFA    | 15.13 | 14.26 | 14.44 | 10.72 $\pm$ 0.52             | 11.12 $\pm$ 1.12             | 11.57 $\pm$ 0.35             | 12.18 $\pm$ 0.29 <sup>a</sup> | 14.41 $\pm$ 0.18 <sup>b</sup> | 13.57 $\pm$ 0.60 <sup>ab</sup> | 10.13 $\pm$ 0.71  | 10.19 $\pm$ 0.28 | 8.57 $\pm$ 0.45  | 8.79 $\pm$ 0.35              | 11.13 $\pm$ 0.83             |
| 18:2 $n$ -6c     | 2.79  | 2.76  | 3.24  | 2.42 $\pm$ 0.19              | 2.92 $\pm$ 0.72              | 3.22 $\pm$ 0.52              | 9.60 $\pm$ 0.12               | 10.03 $\pm$ 0.62              | 9.46 $\pm$ 0.87                | 8.15 $\pm$ 0.44   | 8.57 $\pm$ 0.34  | 7.02 $\pm$ 0.34  | 9.21 $\pm$ 0.36              | 10.59 $\pm$ 0.70             |
| $\Sigma$ n-6PUFA | 2.79  | 2.76  | 3.24  | 2.42 $\pm$ 0.19              | 2.92 $\pm$ 0.72              | 3.22 $\pm$ 0.52              | 9.60 $\pm$ 0.12               | 10.03 $\pm$ 0.62              | 9.46 $\pm$ 0.87                | 8.15 $\pm$ 0.44   | 8.57 $\pm$ 0.34  | 7.02 $\pm$ 0.34  | 9.21 $\pm$ 0.36              | 10.59 $\pm$ 0.70             |
| 20:3 $n$ -3      | 1.12  | 1.22  | 1.05  | 1.46 $\pm$ 0.11              | 1.65 $\pm$ 0.34              | 1.28 $\pm$ 0.09              | 1.66 $\pm$ 0.12               | 1.12 $\pm$ 0.11               | 1.16 $\pm$ 0.23                | 1.51 $\pm$ 0.12   | 1.59 $\pm$ 0.02  | 1.56 $\pm$ 0.06  | 1.21 $\pm$ 0.08              | 1.15 $\pm$ 0.02              |
| 20:5 $n$ -3      | 7.95  | 6.04  | 6.09  | 6.39 $\pm$ 0.38              | 6.95 $\pm$ 0.33              | 6.03 $\pm$ 0.07              | 5.85 $\pm$ 0.62               | 6.33 $\pm$ 0.16               | 6.34 $\pm$ 0.27                | 5.94 $\pm$ 0.40   | 6.36 $\pm$ 0.21  | 5.04 $\pm$ 0.46  | 2.87 $\pm$ 0.09 <sup>a</sup> | 3.3 $\pm$ 0.04 <sup>b</sup>  |
| 22:5 $n$ -3      | 3.29  | 3.29  | 2.98  | 5.13 $\pm$ 0.19 <sup>a</sup> | 3.86 $\pm$ 0.04 <sup>b</sup> | 4.20 $\pm$ 0.11 <sup>b</sup> | 3.10 $\pm$ 0.31               | 3.18 $\pm$ 0.21               | 3.48 $\pm$ 0.28                | 3.90 $\pm$ 0.20   | 4.22 $\pm$ 0.06  | 4.14 $\pm$ 0.21  | 3.32 $\pm$ 0.23              | 3.02 $\pm$ 0.11              |
| 22:6 $n$ -3      | 34.07 | 37.91 | 36.32 | 44.60 $\pm$ 1.73             | 44.34 $\pm$ 2.95             | 43.89 $\pm$ 0.64             | 29.81 $\pm$ 0.36 <sup>a</sup> | 25.87 $\pm$ 0.28 <sup>b</sup> | 27.72 $\pm$ 0.27 <sup>c</sup>  | 41.09 $\pm$ 1.72  | 38.81 $\pm$ 1.07 | 44.09 $\pm$ 1.80 | 49.38 $\pm$ 1.98             | 42.63 $\pm$ 2.71             |
| $\Sigma$ n-3PUFA | 46.42 | 48.46 | 46.43 | 57.58 $\pm$ 1.50             | 56.80 $\pm$ 3.65             | 55.4 $\pm$ 0.75              | 41.08 $\pm$ 0.53 <sup>a</sup> | 37.06 $\pm$ 0.48 <sup>b</sup> | 39.24 $\pm$ 0.58 <sup>ab</sup> | 52.44 $\pm$ 1.800 | 50.98 $\pm$ 1.15 | 54.83 $\pm$ 1.52 | 56.77 $\pm$ 1.93             | 50.09 $\pm$ 2.61             |

<sup>1</sup> F, P, and M represents female, pseudomale, and male, respectively.

<sup>2</sup> Data within the same row and within a same fish batch not sharing a superscript letter were significantly ( $P<0.05$ ) different.

<sup>3</sup> There was not enough pseudomale in WF3 for the fatty acid analysis.

<sup>4</sup> SFA, saturated fatty acids; MUFA, mono-unsaturated fatty acids; n-6PUFA, n-6 poly-unsaturated fatty acids; n-3 PUFA, n-3 poly-unsaturated fatty acid.

**Table S4.** The heart fatty acid composition of experimental fish (%TFA, mean  $\pm$  standard error).

| Fatty acid           | HD               |                  |                  | RZ                            |                               |                                | WF1                          |                               |                              | WF2                            |                               |                               | WF3              |                  |
|----------------------|------------------|------------------|------------------|-------------------------------|-------------------------------|--------------------------------|------------------------------|-------------------------------|------------------------------|--------------------------------|-------------------------------|-------------------------------|------------------|------------------|
|                      | F                | P                | M                | F                             | P                             | M                              | F                            | P                             | M                            | F                              | P                             | M                             | F                | M                |
| 14:0                 | 2.21 $\pm$ 0.23  | 1.81 $\pm$ 0.44  | 1.61 $\pm$ 0.24  | 2.52 $\pm$ 0.28               | 2.51 $\pm$ 0.06               | 2.33 $\pm$ 0.08                | 1.76 $\pm$ 0.11              | 1.82 $\pm$ 0.11               | 1.97 $\pm$ 0.14              | 1.54 $\pm$ 0.09                | 1.95 $\pm$ 0.08               | 1.71 $\pm$ 0.15               | 1.22 $\pm$ 0.13  | 1.43 $\pm$ 0.09  |
| 16:0                 | 18.41 $\pm$ 0.26 | 18.17 $\pm$ 0.45 | 19.51 $\pm$ 0.18 | 18.82 $\pm$ 0.02              | 20.03 $\pm$ 0.44              | 19.81 $\pm$ 0.57               | 18.38 $\pm$ 0.24             | 19.11 $\pm$ 0.18              | 18.92 $\pm$ 0.55             | 17.61 $\pm$ 0.21 <sup>a</sup>  | 18.35 $\pm$ 0.27 <sup>a</sup> | 19.86 $\pm$ 0.20 <sup>b</sup> | 18.10 $\pm$ 0.69 | 18.51 $\pm$ 0.32 |
| 18:0                 | 8.39 $\pm$ 0.63  | 9.84 $\pm$ 1.11  | 9.81 $\pm$ 0.73  | 7.79 $\pm$ 1.03               | 7.39 $\pm$ 0.08               | 7.53 $\pm$ 0.35                | 9.88 $\pm$ 0.18              | 9.32 $\pm$ 0.17               | 8.82 $\pm$ 0.37              | 10.75 $\pm$ 0.08 <sup>a</sup>  | 9.13 $\pm$ 0.35 <sup>ab</sup> | 9.41 $\pm$ 0.46 <sup>b</sup>  | 11.83 $\pm$ 1.38 | 9.07 $\pm$ 0.57  |
| $\Sigma$ SFA         | 29.01 $\pm$ 0.15 | 29.82 $\pm$ 0.57 | 30.94 $\pm$ 0.6  | 29.13 $\pm$ 0.78              | 29.93 $\pm$ 0.46              | 29.67 $\pm$ 0.59               | 30.02 $\pm$ 0.35             | 30.25 $\pm$ 0.18              | 29.72 $\pm$ 0.53             | 29.90 $\pm$ 0.04 <sup>ab</sup> | 29.43 $\pm$ 0.10 <sup>a</sup> | 30.98 $\pm$ 0.46 <sup>b</sup> | 31.15 $\pm$ 1.91 | 29.01 $\pm$ 0.32 |
| 16:1 <sub>n-7</sub>  | 3.54 $\pm$ 0.71  | 2.87 $\pm$ 1.10  | 2.54 $\pm$ 0.74  | 2.29 $\pm$ 0.31 <sup>a</sup>  | 3.24 $\pm$ 0.01 <sup>b</sup>  | 2.57 $\pm$ 0.13 <sup>ab</sup>  | 1.67 $\pm$ 0.11              | 2.08 $\pm$ 0.18               | 2.37 $\pm$ 0.20              | 1.10 $\pm$ 0.10                | 1.81 $\pm$ 0.22               | 1.59 $\pm$ 0.27               | 1.19 $\pm$ 0.10  | 1.32 $\pm$ 0.22  |
| 17:1 <sub>n-7</sub>  | 0.76 $\pm$ 0.04  | 0.82 $\pm$ 0.03  | 0.77 $\pm$ 0.03  | 0.61 $\pm$ 0.19               | 0.47 $\pm$ 0.00               | 0.46 $\pm$ 0.02                | 0.61 $\pm$ 0.03 <sup>a</sup> | 0.49 $\pm$ 0.02 <sup>ab</sup> | 0.45 $\pm$ 0.05 <sup>b</sup> | 0.75 $\pm$ 0.06 <sup>a</sup>   | 0.49 $\pm$ 0.06 <sup>b</sup>  | 0.51 $\pm$ 0.04 <sup>b</sup>  | 0.45 $\pm$ 0.12  | 0.37 $\pm$ 0.02  |
| 18:1 <sub>n-9c</sub> | 8.54 $\pm$ 0.58  | 9.05 $\pm$ 0.68  | 9.32 $\pm$ 0.38  | 8.24 $\pm$ 0.06               | 9.66 $\pm$ 0.76               | 9.01 $\pm$ 0.20                | 9.10 $\pm$ 0.26              | 9.45 $\pm$ 0.57               | 10.98 $\pm$ 0.74             | 7.83 $\pm$ 0.29                | 9.65 $\pm$ 0.46               | 8.95 $\pm$ 0.58               | 8.80 $\pm$ 0.31  | 9.57 $\pm$ 0.58  |
| $\Sigma$ MUFA        | 11.61 $\pm$ 0.04 | 11.18 $\pm$ 1.12 | 11.56 $\pm$ 0.12 | 11.14 $\pm$ 0.06 <sup>a</sup> | 13.36 $\pm$ 0.77 <sup>b</sup> | 12.03 $\pm$ 0.15 <sup>ab</sup> | 11.38 $\pm$ 0.37             | 12.02 $\pm$ 0.73              | 13.80 $\pm$ 0.85             | 9.69 $\pm$ 0.33                | 11.95 $\pm$ 0.63              | 11.05 $\pm$ 0.80              | 10.43 $\pm$ 0.29 | 11.26 $\pm$ 0.76 |
| 18:2 <sub>n-6c</sub> | 3.20 $\pm$ 0.17  | 3.14 $\pm$ 0.29  | 3.34 $\pm$ 0.21  | 3.14 $\pm$ 0.06               | 2.95 $\pm$ 0.08               | 3.16 $\pm$ 0.32                | 13.01 $\pm$ 0.15             | 12.72 $\pm$ 0.55              | 13.00 $\pm$ 0.35             | 10.73 $\pm$ 0.02 <sup>a</sup>  | 11.22 $\pm$ 0.18 <sup>a</sup> | 9.17 $\pm$ 0.48 <sup>b</sup>  | 15.20 $\pm$ 1.04 | 15.19 $\pm$ 0.66 |
| $\Sigma$ n-6PUFA     | 3.20 $\pm$ 0.17  | 3.14 $\pm$ 0.29  | 3.34 $\pm$ 0.21  | 3.14 $\pm$ 0.06               | 2.95 $\pm$ 0.08               | 3.16 $\pm$ 0.32                | 13.01 $\pm$ 0.15             | 12.72 $\pm$ 0.55              | 13.00 $\pm$ 0.35             | 10.73 $\pm$ 0.02 <sup>a</sup>  | 11.22 $\pm$ 0.18 <sup>a</sup> | 9.17 $\pm$ 0.48 <sup>b</sup>  | 15.20 $\pm$ 1.04 | 15.19 $\pm$ 0.66 |
| 20:3 <sub>n-3</sub>  | 2.65 $\pm$ 0.32  | 2.91 $\pm$ 0.36  | 2.64 $\pm$ 0.19  | 2.82 $\pm$ 0.31               | 2.65 $\pm$ 0.17               | 3.02 $\pm$ 0.13                | 2.53 $\pm$ 0.08 <sup>a</sup> | 2.45 $\pm$ 0.03 <sup>ab</sup> | 2.11 $\pm$ 0.14 <sup>b</sup> | 3.51 $\pm$ 0.02 <sup>a</sup>   | 2.65 $\pm$ 0.05 <sup>b</sup>  | 2.90 $\pm$ 0.17 <sup>b</sup>  | 3.77 $\pm$ 0.25  | 2.99 $\pm$ 0.28  |
| 20:5 <sub>n-3</sub>  | 11.61 $\pm$ 0.43 | 9.30 $\pm$ 0.58  | 10.00 $\pm$ 0.93 | 10.75 $\pm$ 0.03              | 10.96 $\pm$ 0.95              | 10.96 $\pm$ 0.85               | 8.64 $\pm$ 0.32              | 8.85 $\pm$ 0.24               | 8.01 $\pm$ 0.52              | 7.88 $\pm$ 0.04                | 7.93 $\pm$ 0.37               | 7.35 $\pm$ 0.26               | 5.29 $\pm$ 0.16  | 5.28 $\pm$ 0.32  |
| 22:5 <sub>n-3</sub>  | 3.19 $\pm$ 0.10  | 3.04 $\pm$ 0.33  | 2.84 $\pm$ 0.18  | 3.29 $\pm$ 0.06               | 3.13 $\pm$ 0.06               | 3.44 $\pm$ 0.16                | 2.67 $\pm$ 0.13              | 2.51 $\pm$ 0.19               | 2.31 $\pm$ 0.18              | 3.29 $\pm$ 0.36                | 3.31 $\pm$ 0.11               | 3.14 $\pm$ 0.10               | 2.43 $\pm$ 0.10  | 2.33 $\pm$ 0.14  |
| 22:6 <sub>n-3</sub>  | 24.26 $\pm$ 0.49 | 27.61 $\pm$ 2.72 | 30.42 $\pm$ 1.50 | 24.17 $\pm$ 0.13              | 21.25 $\pm$ 0.39              | 23.57 $\pm$ 0.70               | 20.45 $\pm$ 0.41             | 20.76 $\pm$ 1.34              | 19.88 $\pm$ 0.33             | 24.34 $\pm$ 0.73 <sup>ab</sup> | 21.76 $\pm$ 0.39 <sup>a</sup> | 25.41 $\pm$ 1.19 <sup>b</sup> | 24.13 $\pm$ 0.89 | 23.75 $\pm$ 1.27 |
| $\Sigma$ n-3PUFA     | 40.21 $\pm$ 1.83 | 40.74 $\pm$ 2.31 | 42.05 $\pm$ 1.68 | 41.03 $\pm$ 0.21              | 38.00 $\pm$ 1.57              | 40.99 $\pm$ 0.43               | 34.29 $\pm$ 0.64             | 34.57 $\pm$ 1.28              | 32.31 $\pm$ 0.91             | 39.01 $\pm$ 0.35               | 35.65 $\pm$ 0.63              | 38.80 $\pm$ 1.16              | 35.62 $\pm$ 1.09 | 34.35 $\pm$ 1.35 |

<sup>1</sup> F, P, and M represents female, pseudomale, and male, respectively.

<sup>2</sup> Data within the same row and within a same fish batch not sharing a superscript letter were significantly ( $P < 0.05$ ) different.

<sup>3</sup> There was not enough pseudomale in WF3 for the fatty acid analysis.

<sup>4</sup> SFA, saturated fatty acids; MUFA, mono-unsaturated fatty acids; n-6PUFA, n-6 poly-unsaturated fatty acids; n-3 PUFA, n-3 poly-unsaturated fatty acid.

**Table S5.** The gill fatty acid composition of experimental fish (%TFA, mean  $\pm$  standard error).

| Fatty acid        | HD               |                  |                  | RZ                            |                                |                               | WF1                           |                               |                                | WF2                           |                                |                               | WF3                           |                               |
|-------------------|------------------|------------------|------------------|-------------------------------|--------------------------------|-------------------------------|-------------------------------|-------------------------------|--------------------------------|-------------------------------|--------------------------------|-------------------------------|-------------------------------|-------------------------------|
|                   | F                | P                | M                | F                             | P                              | M                             | F                             | P                             | M                              | F                             | P                              | M                             | F                             | M                             |
| 14:0              | 2.3 $\pm$ 0.25   | 1.48 $\pm$ 0.33  | 1.59 $\pm$ 0.21  | 2.19 $\pm$ 0.29               | 2.34 $\pm$ 0.04                | 2.66 $\pm$ 0.11               | 1.34 $\pm$ 0.10 <sup>a</sup>  | 2.01 $\pm$ 0.03 <sup>b</sup>  | 1.81 $\pm$ 0.22 <sup>ab</sup>  | 2.03 $\pm$ 0.15               | 1.98 $\pm$ 0.17                | 2.01 $\pm$ 0.23               | 1.03 $\pm$ 0.06               | 1.39 $\pm$ 0.16               |
| 16:0              | 15.73 $\pm$ 0.24 | 14.84 $\pm$ 0.59 | 14.77 $\pm$ 0.36 | 16.14 $\pm$ 0.37 <sup>a</sup> | 17.36 $\pm$ 0.39 <sup>ab</sup> | 17.99 $\pm$ 0.29 <sup>b</sup> | 15.74 $\pm$ 0.20 <sup>a</sup> | 17.06 $\pm$ 0.24 <sup>b</sup> | 16.32 $\pm$ 0.22 <sup>ab</sup> | 16.76 $\pm$ 0.17 <sup>a</sup> | 18.09 $\pm$ 0.51 <sup>ab</sup> | 19.62 $\pm$ 0.85 <sup>b</sup> | 15.17 $\pm$ 0.11 <sup>a</sup> | 16.57 $\pm$ 0.18 <sup>b</sup> |
| 18:0              | 7.73 $\pm$ 0.75  | 8.80 $\pm$ 0.78  | 8.52 $\pm$ 0.54  | 8.71 $\pm$ 0.56               | 8.07 $\pm$ 0.32                | 7.43 $\pm$ 0.19               | 9.88 $\pm$ 0.18               | 8.54 $\pm$ 0.14               | 8.53 $\pm$ 0.70                | 9.63 $\pm$ 0.38               | 9.86 $\pm$ 0.40                | 9.33 $\pm$ 0.74               | 10.14 $\pm$ 0.35              | 8.83 $\pm$ 0.47               |
| $\Sigma$ SFA      | 25.75 $\pm$ 0.43 | 25.12 $\pm$ 0.54 | 24.87 $\pm$ 0.25 | 27.03 $\pm$ 0.32              | 27.77 $\pm$ 0.66               | 28.08 $\pm$ 0.23              | 26.95 $\pm$ 0.3               | 27.60 $\pm$ 0.34              | 26.66 $\pm$ 0.70               | 28.42 $\pm$ 0.44              | 29.93 $\pm$ 0.32               | 30.95 $\pm$ 1.39              | 26.34 $\pm$ 0.4               | 26.79 $\pm$ 0.42              |
| 16:1 $n$ -7       | 4.59 $\pm$ 0.71  | 3.33 $\pm$ 0.81  | 3.22 $\pm$ 0.62  | 2.69 $\pm$ 0.36               | 3.21 $\pm$ 0.19                | 3.47 $\pm$ 0.21               | 2.03 $\pm$ 0.11 <sup>a</sup>  | 2.53 $\pm$ 0.02 <sup>b</sup>  | 2.44 $\pm$ 0.19 <sup>ab</sup>  | 1.91 $\pm$ 0.13               | 1.85 $\pm$ 0.21                | 2.05 $\pm$ 0.34               | 1.33 $\pm$ 0.04 <sup>a</sup>  | 1.77 $\pm$ 0.15 <sup>b</sup>  |
| 17:1 $n$ -7       | 1.26 $\pm$ 0.24  | 1.32 $\pm$ 0.20  | 1.51 $\pm$ 0.02  | 0.93 $\pm$ 0.08 <sup>a</sup>  | 0.76 $\pm$ 0.01 <sup>ab</sup>  | 0.67 $\pm$ 0.01 <sup>b</sup>  | 1.03 $\pm$ 0.02               | 0.71 $\pm$ 0.16               | 0.61 $\pm$ 0.01                | 0.92 $\pm$ 0.08               | 0.81 $\pm$ 0.10                | 0.87 $\pm$ 0.04               | 0.70 $\pm$ 0.06               | 0.53 $\pm$ 0.01               |
| 18:1 $n$ -9c      | 10.86 $\pm$ 0.30 | 11.39 $\pm$ 0.30 | 11.9 $\pm$ 0.60  | 11.56 $\pm$ 0.13              | 11.86 $\pm$ 0.35               | 11.25 $\pm$ 0.07              | 12.49 $\pm$ 0.11              | 12.98 $\pm$ 0.3               | 12.61 $\pm$ 0.18               | 12.35 $\pm$ 0.41              | 12.81 $\pm$ 0.27               | 11.88 $\pm$ 0.72              | 12.95 $\pm$ 0.29              | 13.63 $\pm$ 0.56              |
| $\Sigma$ MUFA     | 16.71 $\pm$ 0.32 | 16.03 $\pm$ 0.91 | 16.64 $\pm$ 1.15 | 15.85 $\pm$ 0.13              | 16.35 $\pm$ 0.29               | 15.85 $\pm$ 0.25              | 15.55 $\pm$ 0.19              | 16.23 $\pm$ 0.17              | 15.66 $\pm$ 0.36               | 15.18 $\pm$ 0.51              | 15.47 $\pm$ 0.35               | 14.80 $\pm$ 1.09              | 14.97 $\pm$ 0.37              | 15.93 $\pm$ 0.42              |
| 18:2 $n$ -6c      | 3.58 $\pm$ 0.09  | 3.52 $\pm$ 0.11  | 3.69 $\pm$ 0.15  | 3.51 $\pm$ 0.07               | 3.58 $\pm$ 0.28                | 3.35 $\pm$ 0.23               | 14.62 $\pm$ 0.39              | 15.12 $\pm$ 0.02              | 15.16 $\pm$ 0.02               | 12.95 $\pm$ 0.17              | 13.17 $\pm$ 0.15               | 11.87 $\pm$ 0.69              | 16.77 $\pm$ 1.04              | 16.37 $\pm$ 1.46              |
| 20:4 $n$ -6       | 0.33 $\pm$ 0.02  | 0.21 $\pm$ 0.05  | 0.27 $\pm$ 0.01  | 0.25 $\pm$ 0.08               | 0.21 $\pm$ 0.03                | 0.23 $\pm$ 0.03               | 0.17 $\pm$ 0.04               | 0.15 $\pm$ 0.04               | 0.15 $\pm$ 0.01                | 0.42 $\pm$ 0.04 <sup>a</sup>  | 0.17 $\pm$ 0.02 <sup>b</sup>   | 0.45 $\pm$ 0.02 <sup>a</sup>  | 0.22 $\pm$ 0.01               | 0.17 $\pm$ 0.02               |
| $\Sigma n$ -6PUFA | 3.91 $\pm$ 0.11  | 3.74 $\pm$ 0.12  | 3.96 $\pm$ 0.15  | 4.21 $\pm$ 0.16               | 4.37 $\pm$ 0.25                | 4.31 $\pm$ 0.23               | 14.79 $\pm$ 0.42              | 15.28 $\pm$ 0.02              | 15.31 $\pm$ 0.03               | 13.38 $\pm$ 0.19              | 13.33 $\pm$ 0.16               | 12.32 $\pm$ 0.71              | 16.99 $\pm$ 1.03              | 16.54 $\pm$ 1.47              |
| 18:3 $n$ -3       | 0.51 $\pm$ 0.02  | 0.39 $\pm$ 0.08  | 0.42 $\pm$ 0.08  | 0.62 $\pm$ 0.04 <sup>a</sup>  | 0.66 $\pm$ 0.04 <sup>a</sup>   | 0.89 $\pm$ 0.04 <sup>b</sup>  | 0.53 $\pm$ 0.03 <sup>a</sup>  | 0.67 $\pm$ 0.02 <sup>b</sup>  | 0.63 $\pm$ 0.02 <sup>ab</sup>  | 0.71 $\pm$ 0.06               | 0.71 $\pm$ 0.10                | 0.74 $\pm$ 0.12               | 0.55 $\pm$ 0.08               | 0.81 $\pm$ 0.11               |
| 20:3 $n$ -3       | 3.15 $\pm$ 0.16  | 3.47 $\pm$ 0.27  | 3.55 $\pm$ 0.21  | 4.22 $\pm$ 0.36 <sup>a</sup>  | 3.56 $\pm$ 0.12 <sup>ab</sup>  | 3.18 $\pm$ 0.06 <sup>b</sup>  | 3.10 $\pm$ 0.12               | 2.61 $\pm$ 0.07               | 2.92 $\pm$ 0.23                | 4.16 $\pm$ 0.14               | 3.21 $\pm$ 0.32                | 3.54 $\pm$ 0.33               | 4.12 $\pm$ 0.06 <sup>a</sup>  | 3.35 $\pm$ 0.06 <sup>b</sup>  |
| 20:5 $n$ -3       | 9.92 $\pm$ 0.65  | 8.43 $\pm$ 0.46  | 8.00 $\pm$ 0.44  | 8.82 $\pm$ 0.56               | 9.39 $\pm$ 0.57                | 9.75 $\pm$ 0.44               | 6.68 $\pm$ 0.17               | 6.95 $\pm$ 0.26               | 6.95 $\pm$ 0.58                | 5.63 $\pm$ 0.36               | 6.56 $\pm$ 0.31                | 5.83 $\pm$ 0.80               | 3.64 $\pm$ 0.05               | 4.21 $\pm$ 0.36               |
| 22:5 $n$ -3       | 4.21 $\pm$ 0.26  | 4.13 $\pm$ 0.30  | 4.10 $\pm$ 0.38  | 4.16 $\pm$ 0.2                | 4.27 $\pm$ 0.08                | 4.02 $\pm$ 0.17               | 3.51 $\pm$ 0.02 <sup>a</sup>  | 3.10 $\pm$ 0.18 <sup>ab</sup> | 2.83 $\pm$ 0.16 <sup>b</sup>   | 3.55 $\pm$ 0.22               | 3.3 $\pm$ 0.18                 | 3.38 $\pm$ 0.15               | 2.62 $\pm$ 0.16               | 2.51 $\pm$ 0.08               |
| 22:6 $n$ -3       | 18.81 $\pm$ 0.08 | 22.25 $\pm$ 2.25 | 21.89 $\pm$ 1.88 | 18.94 $\pm$ 0.37              | 18.25 $\pm$ 0.15               | 18.00 $\pm$ 0.11              | 14.26 $\pm$ 0.95              | 13.03 $\pm$ 0.47              | 13.68 $\pm$ 0.31               | 14.84 $\pm$ 0.32              | 15.71 $\pm$ 0.19               | 16.14 $\pm$ 0.71              | 16.45 $\pm$ 0.86              | 15.24 $\pm$ 0.86              |
| $\Sigma n$ -3PUFA | 36.60 $\pm$ 0.59 | 38.68 $\pm$ 2.18 | 37.96 $\pm$ 1.28 | 36.76 $\pm$ 0.3               | 36.14 $\pm$ 0.54               | 35.85 $\pm$ 0.31              | 28.08 $\pm$ 0.75              | 26.37 $\pm$ 0.73              | 27.02 $\pm$ 0.98               | 28.88 $\pm$ 0.44              | 29.49 $\pm$ 0.47               | 29.62 $\pm$ 0.81              | 27.37 $\pm$ 0.92              | 26.12 $\pm$ 0.90              |

<sup>1</sup> F, P, and M represents female, pseudomale, and male, respectively.

<sup>2</sup> Data within the same row and within a same fish batch not sharing a superscript letter were significantly ( $P < 0.05$ ) different.

<sup>3</sup> There was not enough pseudomale in WF3 for the fatty acid analysis.

<sup>4</sup> SFA, saturated fatty acids; MUFA, mono-unsaturated fatty acids; n-6PUFA, n-6 poly-unsaturated fatty acids; n-3 PUFA, n-3 poly-unsaturated fatty acid.

**Table S6.** The intestine fatty acid composition of experimental fish (%TFA, mean  $\pm$  standard error).

| Fatty acid        | HD                           |                              |                               | RZ                           |                              |                               | WF1              |                  |                  | WF2                           |                                |                               | WF3              |                  |
|-------------------|------------------------------|------------------------------|-------------------------------|------------------------------|------------------------------|-------------------------------|------------------|------------------|------------------|-------------------------------|--------------------------------|-------------------------------|------------------|------------------|
|                   | F                            | P                            | M                             | F                            | P                            | M                             | F                | P                | M                | F                             | P                              | M                             | F                | M                |
| 14:0              | 4.27 $\pm$ 0.18              | 4.43 $\pm$ 0.07              | 3.89 $\pm$ 0.06               | 5.04 $\pm$ 0.08              | 4.98 $\pm$ 0.39              | 4.60 $\pm$ 0.40               | 3.02 $\pm$ 0.33  | 3.53 $\pm$ 0.22  | 3.23 $\pm$ 0.05  | 3.28 $\pm$ 0.10               | 3.03 $\pm$ 0.16                | 3.01 $\pm$ 0.12               | 2.60 $\pm$ 0.20  | 2.64 $\pm$ 0.13  |
| 16:0              | 17.75 $\pm$ 0.82             | 17.68 $\pm$ 0.37             | 17.58 $\pm$ 1.44              | 20.13 $\pm$ 0.39             | 21.13 $\pm$ 0.62             | 21.33 $\pm$ 1.48              | 18.36 $\pm$ 0.80 | 18.31 $\pm$ 1.19 | 18.06 $\pm$ 1.36 | 17.33 $\pm$ 0.27 <sup>a</sup> | 17.75 $\pm$ 0.02 <sup>a</sup>  | 18.74 $\pm$ 0.23 <sup>b</sup> | 17.57 $\pm$ 1.08 | 17.84 $\pm$ 0.11 |
| 18:0              | 5.45 $\pm$ 0.41              | 5.13 $\pm$ 0.25              | 5.96 $\pm$ 0.81               | 5.97 $\pm$ 0.49              | 6.05 $\pm$ 0.63              | 6.53 $\pm$ 0.76               | 7.54 $\pm$ 1.32  | 5.83 $\pm$ 0.65  | 5.89 $\pm$ 0.28  | 6.72 $\pm$ 0.59               | 6.15 $\pm$ 0.24                | 7.29 $\pm$ 0.13               | 7.62 $\pm$ 0.55  | 7.02 $\pm$ 0.14  |
| $\Sigma$ SFA      | 27.47 $\pm$ 1.23             | 27.25 $\pm$ 0.55             | 27.42 $\pm$ 2.31              | 31.14 $\pm$ 0.75             | 32.16 $\pm$ 0.95             | 32.45 $\pm$ 2.18              | 28.92 $\pm$ 1.78 | 27.67 $\pm$ 1.67 | 27.18 $\pm$ 1.6  | 27.33 $\pm$ 0.79              | 26.93 $\pm$ 0.22               | 29.04 $\pm$ 0.28              | 27.79 $\pm$ 1.68 | 27.49 $\pm$ 0.23 |
| 14:1 $n$ -5       | 0.46 $\pm$ 0.02              | 0.50 $\pm$ 0.01              | 0.45 $\pm$ 0.03               | 0.55 $\pm$ 0.03              | 0.69 $\pm$ 0.09              | 0.61 $\pm$ 0.13               | 0.36 $\pm$ 0.03  | 0.37 $\pm$ 0.02  | 0.37 $\pm$ 0.03  | 0.43 $\pm$ 0.00               | 0.43 $\pm$ 0.01                | 0.43 $\pm$ 0.01               | 0.45 $\pm$ 0.03  | 0.46 $\pm$ 0.00  |
| 16:1 $n$ -7       | 5.11 $\pm$ 0.20              | 6.29 $\pm$ 0.20              | 5.31 $\pm$ 0.84               | 4.36 $\pm$ 0.20              | 4.33 $\pm$ 0.37              | 3.99 $\pm$ 0.44               | 3.47 $\pm$ 0.72  | 4.46 $\pm$ 0.54  | 4.15 $\pm$ 0.42  | 2.96 $\pm$ 0.18               | 3.15 $\pm$ 0.15                | 2.70 $\pm$ 0.07               | 2.50 $\pm$ 0.21  | 2.71 $\pm$ 0.01  |
| 18:1 $n$ -9c      | 7.84 $\pm$ 0.05              | 7.98 $\pm$ 0.18              | 8.25 $\pm$ 0.08               | 9.32 $\pm$ 0.07 <sup>a</sup> | 10.25 $\pm$ 0.2 <sup>b</sup> | 9.57 $\pm$ 0.28 <sup>ab</sup> | 11.66 $\pm$ 0.78 | 12.37 $\pm$ 0.63 | 12.54 $\pm$ 0.91 | 11.04 $\pm$ 0.21              | 11.28 $\pm$ 0.63               | 10.44 $\pm$ 0.06              | 11.67 $\pm$ 0.42 | 12.05 $\pm$ 0.04 |
| $\Sigma$ MUFA     | 13.84 $\pm$ 0.20             | 15.02 $\pm$ 0.38             | 14.3 $\pm$ 0.87               | 14.59 $\pm$ 0.14             | 15.67 $\pm$ 0.27             | 14.6 $\pm$ 0.80               | 15.78 $\pm$ 1.42 | 17.40 $\pm$ 0.73 | 17.32 $\pm$ 1.29 | 14.70 $\pm$ 0.38              | 15.18 $\pm$ 0.79               | 13.85 $\pm$ 0.06              | 14.8 $\pm$ 0.59  | 15.36 $\pm$ 0.05 |
| 18:2 $n$ -6c      | 3.66 $\pm$ 0.09              | 3.91 $\pm$ 0.16              | 3.80 $\pm$ 0.35               | 3.08 $\pm$ 0.11              | 3.26 $\pm$ 0.16              | 3.25 $\pm$ 0.30               | 18.36 $\pm$ 1.53 | 19.06 $\pm$ 0.71 | 18.81 $\pm$ 1.22 | 16.87 $\pm$ 0.39 <sup>a</sup> | 16.49 $\pm$ 0.28 <sup>ab</sup> | 14.81 $\pm$ 0.54 <sup>b</sup> | 20.66 $\pm$ 0.48 | 21.02 $\pm$ 0.31 |
| 20:2 $n$ -6       | 1.52 $\pm$ 0.14              | 1.71 $\pm$ 0.15              | 1.42 $\pm$ 0.32               | 1.26 $\pm$ 0.17              | 1.05 $\pm$ 0.28              | 0.97 $\pm$ 0.21               | 0.71 $\pm$ 0.14  | 0.88 $\pm$ 0.16  | 0.84 $\pm$ 0.05  | 0.81 $\pm$ 0.33               | 0.57 $\pm$ 0.36                | 0.48 $\pm$ 0.23               | 0.66 $\pm$ 0.06  | 0.75 $\pm$ 0.01  |
| 20:3 $n$ -6       | 0.99 $\pm$ 0.09              | 0.91 $\pm$ 0.03              | 0.86 $\pm$ 0.19               | 1.61 $\pm$ 0.07              | 1.66 $\pm$ 0.11              | 1.36 $\pm$ 0.30               | 0.13 $\pm$ 0.03  | 0.12 $\pm$ 0.01  | 0.15 $\pm$ 0.03  | 0.59 $\pm$ 0.06               | 0.40 $\pm$ 0.08                | 0.43 $\pm$ 0.10               | 0.14 $\pm$ 0.03  | 0.16 $\pm$ 0.02  |
| 20:4 $n$ -6       | 0.38 $\pm$ 0.01 <sup>a</sup> | 0.28 $\pm$ 0.00 <sup>b</sup> | 0.34 $\pm$ 0.01 <sup>a</sup>  | 0.24 $\pm$ 0.03              | 0.21 $\pm$ 0.02              | 0.31 $\pm$ 0.08               | 0.16 $\pm$ 0.03  | 0.11 $\pm$ 0.01  | 0.11 $\pm$ 0.00  | 0.22 $\pm$ 0.02               | 0.21 $\pm$ 0.00                | 0.23 $\pm$ 0.01               | 0.13 $\pm$ 0.06  | 0.13 $\pm$ 0.03  |
| $\Sigma n$ -6PUFA | 6.55 $\pm$ 0.12              | 6.80 $\pm$ 0.34              | 6.42 $\pm$ 0.46               | 6.19 $\pm$ 0.23              | 6.18 $\pm$ 0.38              | 5.88 $\pm$ 0.33               | 19.36 $\pm$ 1.63 | 20.17 $\pm$ 0.85 | 19.9 $\pm$ 1.30  | 18.47 $\pm$ 0.67              | 17.68 $\pm$ 0.54               | 15.95 $\pm$ 0.8               | 21.6 $\pm$ 0.45  | 22.06 $\pm$ 0.3  |
| 18:3 $n$ -3       | 0.90 $\pm$ 0.03              | 0.96 $\pm$ 0.06              | 0.77 $\pm$ 0.08               | 1.33 $\pm$ 0.04              | 1.38 $\pm$ 0.09              | 1.26 $\pm$ 0.16               | 1.89 $\pm$ 0.28  | 2.22 $\pm$ 0.15  | 2.19 $\pm$ 0.12  | 2.05 $\pm$ 0.01               | 2.02 $\pm$ 0.04                | 1.62 $\pm$ 0.18               | 2.25 $\pm$ 0.12  | 2.23 $\pm$ 0.06  |
| 20:3 $n$ -3       | 1.09 $\pm$ 0.01 <sup>a</sup> | 1.2 $\pm$ 0.06 <sup>ab</sup> | 1.31 $\pm$ 0.06 <sup>b</sup>  | 1.13 $\pm$ 0.05              | 1.07 $\pm$ 0.01              | 1.14 $\pm$ 0.11               | 1.07 $\pm$ 0.13  | 0.88 $\pm$ 0.03  | 0.93 $\pm$ 0.06  | 1.19 $\pm$ 0.03               | 1.20 $\pm$ 0.09                | 1.44 $\pm$ 0.13               | 1.46 $\pm$ 0.10  | 1.29 $\pm$ 0.00  |
| 20:5 $n$ -3       | 10.76 $\pm$ 0.36             | 11.54 $\pm$ 0.44             | 11.24 $\pm$ 1.39              | 9.19 $\pm$ 0.87              | 8.28 $\pm$ 0.98              | 8.70 $\pm$ 0.87               | 7.36 $\pm$ 0.46  | 8.25 $\pm$ 0.66  | 7.78 $\pm$ 0.15  | 6.78 $\pm$ 0.20               | 7.40 $\pm$ 0.38                | 5.98 $\pm$ 0.50               | 5.04 $\pm$ 0.59  | 5.75 $\pm$ 0.20  |
| 22:5 $n$ -3       | 2.76 $\pm$ 0.03 <sup>a</sup> | 3.57 $\pm$ 0.26 <sup>b</sup> | 3.29 $\pm$ 0.10 <sup>ab</sup> | 3.16 $\pm$ 0.31              | 2.80 $\pm$ 0.38              | 2.82 $\pm$ 0.29               | 2.44 $\pm$ 0.44  | 1.88 $\pm$ 0.08  | 1.94 $\pm$ 0.16  | 2.77 $\pm$ 0.10               | 2.78 $\pm$ 0.12                | 3.38 $\pm$ 0.45               | 2.64 $\pm$ 0.56  | 1.85 $\pm$ 0.15  |
| 22:6 $n$ -3       | 20.01 $\pm$ 0.38             | 20.59 $\pm$ 0.68             | 20.67 $\pm$ 0.33              | 17.97 $\pm$ 0.16             | 17.22 $\pm$ 0.52             | 17.95 $\pm$ 0.92              | 11.6 $\pm$ 0.99  | 10.65 $\pm$ 0.43 | 11.26 $\pm$ 0.55 | 15.00 $\pm$ 0.51              | 14.61 $\pm$ 0.55               | 17.04 $\pm$ 0.87              | 13.8 $\pm$ 0.59  | 13.44 $\pm$ 0.21 |
| $\Sigma n$ -3PUFA | 35.52 $\pm$ 0.70             | 37.85 $\pm$ 0.50             | 37.29 $\pm$ 1.48              | 32.79 $\pm$ 0.8              | 30.74 $\pm$ 0.73             | 31.86 $\pm$ 1.99              | 24.37 $\pm$ 0.83 | 23.87 $\pm$ 1.02 | 24.11 $\pm$ 0.64 | 27.79 $\pm$ 0.7               | 28.01 $\pm$ 0.93               | 29.46 $\pm$ 0.79              | 25.19 $\pm$ 0.96 | 24.56 $\pm$ 0.17 |

<sup>1</sup> F, P, and M represents female, pseudomale, and male, respectively.<sup>2</sup> Data within the same row and within a same fish batch not sharing a superscript letter were significantly ( $P < 0.05$ ) different.<sup>3</sup> There was not enough pseudomale in WF3 for the fatty acid analysis.<sup>4</sup> SFA, saturated fatty acids; MUFA, mono-unsaturated fatty acids; n-6PUFA, n-6 poly-unsaturated fatty acids; n-3 PUFA, n-3 poly-unsaturated fatty acid.

**Table S7.** The skin fatty acid composition of experimental fish (%TFA, mean  $\pm$  standard error).

| Fatty acid        | HD                           |                               |                              | RZ                           |                               |                              | WF1                           |                                |                               | WF2              |                  |                  | WF3              |                  |
|-------------------|------------------------------|-------------------------------|------------------------------|------------------------------|-------------------------------|------------------------------|-------------------------------|--------------------------------|-------------------------------|------------------|------------------|------------------|------------------|------------------|
|                   | F                            | P                             | M                            | F                            | P                             | M                            | F                             | P                              | M                             | F                | P                | M                | F                | M                |
| 14:0              | 3.44 $\pm$ 0.27              | 3.69 $\pm$ 0.43               | 3.74 $\pm$ 0.44              | 4.34 $\pm$ 0.08 <sup>a</sup> | 3.22 $\pm$ 0.12 <sup>b</sup>  | 3.28 $\pm$ 0.31 <sup>b</sup> | 2.56 $\pm$ 0.43               | 3.22 $\pm$ 0.11                | 3.77 $\pm$ 0.31               | 3.64 $\pm$ 0.14  | 3.37 $\pm$ 0.16  | 3.14 $\pm$ 0.21  | 2.95 $\pm$ 0.41  | 3.06 $\pm$ 0.36  |
| 16:0              | 18.71 $\pm$ 0.35             | 20.03 $\pm$ 0.24              | 20.39 $\pm$ 0.78             | 17.62 $\pm$ 0.28             | 19.06 $\pm$ 0.63              | 19.65 $\pm$ 0.57             | 19.06 $\pm$ 0.69              | 19.30 $\pm$ 0.25               | 18.26 $\pm$ 0.29              | 21.65 $\pm$ 0.52 | 20.96 $\pm$ 0.24 | 22.97 $\pm$ 0.6  | 18.61 $\pm$ 0.38 | 19.79 $\pm$ 0.66 |
| 18:0              | 4.92 $\pm$ 0.50              | 4.88 $\pm$ 0.44               | 5.22 $\pm$ 0.27              | 4.00 $\pm$ 0.15              | 5.78 $\pm$ 0.51               | 5.15 $\pm$ 0.57              | 8.55 $\pm$ 1.20 <sup>a</sup>  | 5.15 $\pm$ 0.66 <sup>ab</sup>  | 3.95 $\pm$ 0.66 <sup>b</sup>  | 5.95 $\pm$ 0.45  | 4.82 $\pm$ 0.14  | 5.18 $\pm$ 0.39  | 5.51 $\pm$ 1.08  | 4.95 $\pm$ 1.13  |
| $\Sigma$ SFA      | 27.07 $\pm$ 0.35             | 28.61 $\pm$ 0.47              | 29.34 $\pm$ 1.26             | 25.96 $\pm$ 0.36             | 28.06 $\pm$ 0.95              | 28.09 $\pm$ 0.75             | 30.18 $\pm$ 1.47 <sup>a</sup> | 27.66 $\pm$ 0.57 <sup>ab</sup> | 25.98 $\pm$ 0.22 <sup>b</sup> | 31.24 $\pm$ 0.82 | 29.15 $\pm$ 0.26 | 31.29 $\pm$ 0.63 | 27.07 $\pm$ 0.91 | 27.80 $\pm$ 1.07 |
| 14:1 $n$ -5       | 0.33 $\pm$ 0.02              | 0.37 $\pm$ 0.03               | 0.43 $\pm$ 0.03              | 0.41 $\pm$ 0.01 <sup>a</sup> | 0.33 $\pm$ 0.03 <sup>ab</sup> | 0.32 $\pm$ 0.02 <sup>b</sup> | 0.25 $\pm$ 0.00               | 0.25 $\pm$ 0.01                | 0.31 $\pm$ 0.02               | 0.32 $\pm$ 0.02  | 0.35 $\pm$ 0.03  | 0.28 $\pm$ 0.05  | 0.47 $\pm$ 0.06  | 0.38 $\pm$ 0.03  |
| 16:1 $n$ -7       | 7.77 $\pm$ 0.28 <sup>a</sup> | 7.02 $\pm$ 0.48 <sup>ab</sup> | 6.12 $\pm$ 0.34 <sup>b</sup> | 6.06 $\pm$ 0.18              | 5.13 $\pm$ 0.32               | 5.24 $\pm$ 0.38              | 3.41 $\pm$ 0.56 <sup>a</sup>  | 5.14 $\pm$ 0.54 <sup>ab</sup>  | 5.82 $\pm$ 0.42 <sup>b</sup>  | 4.70 $\pm$ 0.17  | 5.30 $\pm$ 0.15  | 4.99 $\pm$ 0.29  | 4.36 $\pm$ 0.48  | 4.71 $\pm$ 0.44  |
| 17:1 $n$ -7       | 0.40 $\pm$ 0.15              | 0.24 $\pm$ 0.03               | 0.38 $\pm$ 0.16              | 0.49 $\pm$ 0.02 <sup>a</sup> | 0.27 $\pm$ 0.03 <sup>b</sup>  | 0.49 $\pm$ 0.01 <sup>a</sup> | 0.45 $\pm$ 0.04               | 0.40 $\pm$ 0.03                | 0.44 $\pm$ 0.01               | 0.4 $\pm$ 0.04   | 0.41 $\pm$ 0.04  | 0.43 $\pm$ 0.01  | 0.27 $\pm$ 0.11  | 0.28 $\pm$ 0.12  |
| 18:1 $n$ -9c      | 12.65 $\pm$ 0.28             | 13.87 $\pm$ 0.48              | 12.85 $\pm$ 0.26             | 13.53 $\pm$ 0.42             | 13.51 $\pm$ 0.05              | 13.54 $\pm$ 0.44             | 14.43 $\pm$ 0.13              | 16.85 $\pm$ 0.73               | 16.84 $\pm$ 0.66              | 16.84 $\pm$ 0.39 | 17.98 $\pm$ 0.56 | 17.45 $\pm$ 0.67 | 16.67 $\pm$ 0.65 | 17.03 $\pm$ 0.86 |
| $\Sigma$ MUFA     | 21.16 $\pm$ 0.30             | 21.51 $\pm$ 0.81              | 19.77 $\pm$ 0.10             | 20.49 $\pm$ 0.53             | 19.24 $\pm$ 0.35              | 19.59 $\pm$ 0.65             | 18.55 $\pm$ 0.4               | 22.64 $\pm$ 1.28               | 23.41 $\pm$ 0.86              | 22.26 $\pm$ 0.59 | 24.04 $\pm$ 0.64 | 23.14 $\pm$ 0.97 | 21.77 $\pm$ 0.62 | 22.40 $\pm$ 0.74 |
| 18:2 $n$ -6c      | 3.58 $\pm$ 0.05              | 3.64 $\pm$ 0.10               | 4.32 $\pm$ 0.52              | 3.69 $\pm$ 0.15              | 3.67 $\pm$ 0.34               | 3.64 $\pm$ 0.24              | 15.72 $\pm$ 0.87              | 15.05 $\pm$ 0.06               | 15.51 $\pm$ 0.09              | 13.97 $\pm$ 0.48 | 13.58 $\pm$ 0.42 | 12.63 $\pm$ 0.18 | 16.01 $\pm$ 0.96 | 15.10 $\pm$ 0.97 |
| 20:2 $n$ -6       | 1.08 $\pm$ 0.15              | 0.99 $\pm$ 0.11               | 0.93 $\pm$ 0.05              | 1.05 $\pm$ 0.06              | 0.82 $\pm$ 0.02               | 0.66 $\pm$ 0.17              | 0.60 $\pm$ 0.00               | 0.62 $\pm$ 0.09                | 0.89 $\pm$ 0.10               | 0.6 $\pm$ 0.05   | 0.50 $\pm$ 0.10  | 0.45 $\pm$ 0.07  | 0.68 $\pm$ 0.11  | 0.67 $\pm$ 0.07  |
| 20:4 $n$ -6       | 0.22 $\pm$ 0.02              | 0.26 $\pm$ 0.01               | 0.20 $\pm$ 0.03              | 0.34 $\pm$ 0.03              | 0.34 $\pm$ 0.07               | 0.32 $\pm$ 0.07              | 0.43 $\pm$ 0.04 <sup>a</sup>  | 0.24 $\pm$ 0.04 <sup>ab</sup>  | 0.19 $\pm$ 0.05 <sup>b</sup>  | 0.28 $\pm$ 0.05  | 0.23 $\pm$ 0.03  | 0.20 $\pm$ 0.02  | 0.16 $\pm$ 0.02  | 0.22 $\pm$ 0.04  |
| $\Sigma n$ -6PUFA | 4.88 $\pm$ 0.22              | 4.88 $\pm$ 0.21               | 5.46 $\pm$ 0.53              | 5.08 $\pm$ 0.19              | 4.83 $\pm$ 0.27               | 4.63 $\pm$ 0.36              | 16.75 $\pm$ 0.91              | 15.91 $\pm$ 0.10               | 16.58 $\pm$ 0.16              | 14.85 $\pm$ 0.49 | 14.31 $\pm$ 0.53 | 13.28 $\pm$ 0.15 | 16.85 $\pm$ 0.88 | 15.98 $\pm$ 1.07 |
| 18:3 $n$ -3       | 0.85 $\pm$ 0.03              | 0.83 $\pm$ 0.13               | 0.92 $\pm$ 0.10              | 1.51 $\pm$ 0.12 <sup>a</sup> | 1.05 $\pm$ 0.04 <sup>b</sup>  | 1.49 $\pm$ 0.03 <sup>a</sup> | 0.78 $\pm$ 0.11 <sup>a</sup>  | 1.45 $\pm$ 0.16 <sup>ab</sup>  | 1.76 $\pm$ 0.14 <sup>b</sup>  | 1.08 $\pm$ 0.12  | 1.18 $\pm$ 0.03  | 0.88 $\pm$ 0.08  | 1.76 $\pm$ 0.10  | 1.67 $\pm$ 0.18  |
| 20:3 $n$ -3       | 1.36 $\pm$ 0.07              | 1.36 $\pm$ 0.07               | 1.48 $\pm$ 0.21              | 1.54 $\pm$ 0.04              | 1.73 $\pm$ 0.21               | 1.58 $\pm$ 0.19              | 1.63 $\pm$ 0.17 <sup>a</sup>  | 1.01 $\pm$ 0.13 <sup>b</sup>   | 0.71 $\pm$ 0.09 <sup>b</sup>  | 1.70 $\pm$ 0.11  | 1.28 $\pm$ 0.11  | 1.31 $\pm$ 0.10  | 1.06 $\pm$ 0.23  | 1.00 $\pm$ 0.01  |
| 20:5 $n$ -3       | 10.21 $\pm$ 0.2              | 8.96 $\pm$ 0.56               | 8.59 $\pm$ 0.64              | 8.06 $\pm$ 0.38              | 9.26 $\pm$ 0.33               | 8.89 $\pm$ 0.43              | 7.86 $\pm$ 0.11               | 7.04 $\pm$ 0.14                | 7.09 $\pm$ 0.42               | 6.82 $\pm$ 0.20  | 6.47 $\pm$ 0.24  | 6.14 $\pm$ 0.07  | 4.68 $\pm$ 0.21  | 5.21 $\pm$ 0.01  |
| 22:5 $n$ -3       | 3.21 $\pm$ 0.07              | 3.48 $\pm$ 0.23               | 3.14 $\pm$ 0.24              | 4.17 $\pm$ 0.09              | 4.14 $\pm$ 0.30               | 4.06 $\pm$ 0.26              | 3.04 $\pm$ 0.05               | 2.58 $\pm$ 0.23                | 2.75 $\pm$ 0.20               | 3.00 $\pm$ 0.17  | 3.27 $\pm$ 0.22  | 3.09 $\pm$ 0.21  | 2.74 $\pm$ 0.37  | 2.31 $\pm$ 0.31  |
| 22:6 $n$ -3       | 17.89 $\pm$ 0.31             | 20.32 $\pm$ 1.17              | 18.96 $\pm$ 0.73             | 17.37 $\pm$ 0.15             | 16.65 $\pm$ 0.24              | 17.22 $\pm$ 0.35             | 13.14 $\pm$ 0.4 <sup>a</sup>  | 10.63 $\pm$ 0.56 <sup>b</sup>  | 10.26 $\pm$ 0.40 <sup>b</sup> | 12.14 $\pm$ 0.51 | 11.63 $\pm$ 0.47 | 12.74 $\pm$ 0.40 | 12.64 $\pm$ 0.52 | 12.38 $\pm$ 0.35 |
| $\Sigma n$ -3PUFA | 33.51 $\pm$ 0.21             | 34.95 $\pm$ 1.27              | 33.09 $\pm$ 1.40             | 32.65 $\pm$ 0.06             | 32.82 $\pm$ 0.22              | 33.23 $\pm$ 0.93             | 26.45 $\pm$ 0.29 <sup>a</sup> | 22.71 $\pm$ 0.87 <sup>ab</sup> | 22.56 $\pm$ 0.84 <sup>b</sup> | 24.74 $\pm$ 0.82 | 23.83 $\pm$ 0.88 | 24.16 $\pm$ 0.56 | 22.88 $\pm$ 0.69 | 22.56 $\pm$ 0.75 |

<sup>1</sup> F, P, and M represents female, pseudomale, and male, respectively.<sup>2</sup> Data within the same row and within a same fish batch not sharing a superscript letter were significantly ( $P < 0.05$ ) different.<sup>3</sup> There was not enough pseudomale in WF3 for the fatty acid analysis.<sup>4</sup> SFA, saturated fatty acids; MUFA, mono-unsaturated fatty acids; n-6PUFA, n-6 poly-unsaturated fatty acids; n-3 PUFA, n-3 poly-unsaturated fatty acid.

**Table S8.** The liver fatty acid composition of experimental fish (%TFA, mean  $\pm$  standard error).

| Fatty acid               | HD               |                  |                  | RZ                            |                               |                               | WF1                           |                                |                                | WF2                            |                               |                               | WF3                           |                               |
|--------------------------|------------------|------------------|------------------|-------------------------------|-------------------------------|-------------------------------|-------------------------------|--------------------------------|--------------------------------|--------------------------------|-------------------------------|-------------------------------|-------------------------------|-------------------------------|
|                          | F                | P                | M                | F                             | P                             | M                             | F                             | P                              | M                              | F                              | P                             | M                             | F                             | M                             |
| 14:0                     | 1.75 $\pm$ 0.07  | 1.35 $\pm$ 0.12  | 1.35 $\pm$ 0.17  | 1.89 $\pm$ 0.11               | 2.09 $\pm$ 0.07               | 1.94 $\pm$ 0.15               | 1.44 $\pm$ 0.31               | 1.90 $\pm$ 0.28                | 1.84 $\pm$ 0.18                | 1.15 $\pm$ 0.03                | 1.33 $\pm$ 0.01               | 1.26 $\pm$ 0.10               | 1.17 $\pm$ 0.06               | 1.36 $\pm$ 0.11               |
| 16:0                     | 20.54 $\pm$ 0.22 | 20.13 $\pm$ 0.67 | 20.32 $\pm$ 0.63 | 22.49 $\pm$ 0.54              | 23.74 $\pm$ 0.92              | 24.50 $\pm$ 0.52              | 18.56 $\pm$ 0.27              | 20.43 $\pm$ 0.26               | 19.41 $\pm$ 0.55               | 18.03 $\pm$ 0.49 <sup>a</sup>  | 19.39 $\pm$ 0.21 <sup>b</sup> | 21.29 $\pm$ 0.05 <sup>c</sup> | 18.69 $\pm$ 0.48 <sup>a</sup> | 20.93 $\pm$ 0.24 <sup>b</sup> |
| 18:0                     | 9.32 $\pm$ 1.19  | 11.34 $\pm$ 0.09 | 11.89 $\pm$ 0.09 | 9.73 $\pm$ 0.93               | 7.78 $\pm$ 0.44               | 8.45 $\pm$ 0.67               | 13.20 $\pm$ 0.66 <sup>a</sup> | 10.85 $\pm$ 0.64 <sup>ab</sup> | 9.99 $\pm$ 0.30 <sup>b</sup>   | 14.29 $\pm$ 0.10 <sup>a</sup>  | 12.40 $\pm$ 0.26 <sup>b</sup> | 11.96 $\pm$ 0.09 <sup>b</sup> | 12.98 $\pm$ 0.31              | 11.45 $\pm$ 0.84              |
| $\Sigma$ SFA             | 31.60 $\pm$ 0.90 | 32.82 $\pm$ 0.64 | 33.57 $\pm$ 0.36 | 34.11 $\pm$ 1.27              | 33.62 $\pm$ 0.43              | 34.9 $\pm$ 0.43               | 33.19 $\pm$ 0.08 <sup>a</sup> | 33.17 $\pm$ 0.62 <sup>a</sup>  | 31.25 $\pm$ 0.26 <sup>b</sup>  | 33.48 $\pm$ 0.40 <sup>ab</sup> | 33.12 $\pm$ 0.22 <sup>b</sup> | 34.52 $\pm$ 0.16 <sup>b</sup> | 32.85 $\pm$ 0.73              | 33.73 $\pm$ 0.83              |
| 14:1 $n$ -5              | 0.21 $\pm$ 0.00  | 0.26 $\pm$ 0.00  | 0.25 $\pm$ 0.02  | 0.30 $\pm$ 0.01               | 0.26 $\pm$ 0.02               | 0.27 $\pm$ 0.03               | 0.19 $\pm$ 0.01               | 0.19 $\pm$ 0.03                | 0.21 $\pm$ 0.03                | 0.22 $\pm$ 0.01                | 0.21 $\pm$ 0.01               | 0.20 $\pm$ 0.01               | 0.25 $\pm$ 0.01               | 0.25 $\pm$ 0.02               |
| 16:1 $n$ -7              | 3.32 $\pm$ 0.68  | 1.55 $\pm$ 0.24  | 1.63 $\pm$ 0.34  | 2.10 $\pm$ 0.48               | 3.03 $\pm$ 0.23               | 3.07 $\pm$ 0.52               | 1.35 $\pm$ 0.07               | 1.98 $\pm$ 0.44                | 2.01 $\pm$ 0.16                | 0.90 $\pm$ 0.01 <sup>a</sup>   | 1.34 $\pm$ 0.08 <sup>b</sup>  | 1.09 $\pm$ 0.08 <sup>ab</sup> | 1.11 $\pm$ 0.05               | 1.30 $\pm$ 0.20               |
| 17:1 $n$ -7              | 0.35 $\pm$ 0.00  | 0.31 $\pm$ 0.02  | 0.32 $\pm$ 0.03  | 0.29 $\pm$ 0.03               | 0.35 $\pm$ 0.03               | 0.33 $\pm$ 0.02               | 0.24 $\pm$ 0.04               | 0.26 $\pm$ 0.16                | 0.23 $\pm$ 0.02                | 0.23 $\pm$ 0.01                | 0.28 $\pm$ 0.02               | 0.21 $\pm$ 0.02               | 0.26 $\pm$ 0.03               | 0.23 $\pm$ 0.02               |
| 18:1 $n$ -9 <sup>c</sup> | 7.50 $\pm$ 0.62  | 5.86 $\pm$ 0.45  | 6.29 $\pm$ 0.38  | 7.44 $\pm$ 0.43               | 7.95 $\pm$ 0.14               | 7.76 $\pm$ 0.57               | 7.83 $\pm$ 0.27               | 9.14 $\pm$ 1.40                | 9.45 $\pm$ 0.47                | 6.67 $\pm$ 0.19                | 7.85 $\pm$ 0.56               | 7.56 $\pm$ 0.27               | 7.99 $\pm$ 0.16               | 8.10 $\pm$ 0.59               |
| $\Sigma$ MUFA            | 11.38 $\pm$ 1.30 | 7.97 $\pm$ 0.71  | 8.49 $\pm$ 0.74  | 10.13 $\pm$ 0.88              | 11.60 $\pm$ 0.11              | 11.43 $\pm$ 1.07              | 9.61 $\pm$ 0.18               | 11.57 $\pm$ 1.71               | 11.90 $\pm$ 0.64               | 8.02 $\pm$ 0.19                | 9.68 $\pm$ 0.67               | 9.06 $\pm$ 0.21               | 9.61 $\pm$ 0.23               | 9.87 $\pm$ 0.82               |
| 18:2 $n$ -6 <sup>c</sup> | 3.14 $\pm$ 0.11  | 2.53 $\pm$ 0.33  | 2.66 $\pm$ 0.32  | 2.72 $\pm$ 0.07               | 3.25 $\pm$ 0.54               | 2.85 $\pm$ 0.08               | 13.43 $\pm$ 0.31              | 14.31 $\pm$ 0.31               | 13.63 $\pm$ 0.58               | 12.88 $\pm$ 0.41               | 13.83 $\pm$ 0.76              | 11.23 $\pm$ 0.65              | 16.61 $\pm$ 1.91              | 18.11 $\pm$ 0.82              |
| 20:4 $n$ -6              | 0.24 $\pm$ 0.02  | 0.24 $\pm$ 0.03  | 0.17 $\pm$ 0.02  | 0.34 $\pm$ 0.03               | 0.37 $\pm$ 0.06               | 0.42 $\pm$ 0.06               | 0.39 $\pm$ 0.00               | 0.46 $\pm$ 0.06                | 0.45 $\pm$ 0.08                | 0.30 $\pm$ 0.02                | 0.26 $\pm$ 0.06               | 0.18 $\pm$ 0.04               | 0.21 $\pm$ 0.02               | 0.27 $\pm$ 0.03               |
| $\Sigma n$ -6PUFA        | 3.38 $\pm$ 0.09  | 2.77 $\pm$ 0.36  | 2.83 $\pm$ 0.34  | 3.06 $\pm$ 0.06               | 3.63 $\pm$ 0.49               | 3.27 $\pm$ 0.03               | 13.82 $\pm$ 0.30              | 14.77 $\pm$ 0.25               | 14.08 $\pm$ 0.55               | 13.18 $\pm$ 0.42               | 14.09 $\pm$ 0.79              | 11.41 $\pm$ 0.69              | 16.82 $\pm$ 1.93              | 18.38 $\pm$ 0.84              |
| 18:3 $n$ -3              | 0.48 $\pm$ 0.02  | 0.38 $\pm$ 0.04  | 0.41 $\pm$ 0.03  | 0.72 $\pm$ 0.03 <sup>a</sup>  | 0.80 $\pm$ 0.02 <sup>ab</sup> | 0.86 $\pm$ 0.03 <sup>b</sup>  | 0.57 $\pm$ 0.03 <sup>a</sup>  | 1.19 $\pm$ 0.17 <sup>b</sup>   | 0.91 $\pm$ 0.05 <sup>ab</sup>  | 0.54 $\pm$ 0.04 <sup>a</sup>   | 0.83 $\pm$ 0.02 <sup>b</sup>  | 0.46 $\pm$ 0.09 <sup>a</sup>  | 0.77 $\pm$ 0.13               | 0.89 $\pm$ 0.14               |
| 20:3 $n$ -3              | 2.18 $\pm$ 0.03  | 2.70 $\pm$ 0.13  | 2.66 $\pm$ 0.38  | 2.61 $\pm$ 0.13 <sup>a</sup>  | 2.38 $\pm$ 0.05 <sup>ab</sup> | 2.16 $\pm$ 0.08 <sup>b</sup>  | 2.29 $\pm$ 0.15               | 2.00 $\pm$ 0.26                | 1.93 $\pm$ 0.06                | 3.16 $\pm$ 0.06                | 2.86 $\pm$ 0.09               | 3.05 $\pm$ 0.07               | 3.41 $\pm$ 0.08               | 2.81 $\pm$ 0.28               |
| 20:5 $n$ -3              | 12.46 $\pm$ 0.33 | 10.03 $\pm$ 0.22 | 11.07 $\pm$ 1.01 | 10.60 $\pm$ 0.45              | 12.28 $\pm$ 0.46              | 12.02 $\pm$ 0.49              | 9.79 $\pm$ 0.58               | 9.64 $\pm$ 0.32                | 9.15 $\pm$ 0.55                | 8.44 $\pm$ 0.19                | 9.64 $\pm$ 0.48               | 8.32 $\pm$ 0.72               | 6.01 $\pm$ 0.45               | 6.46 $\pm$ 0.48               |
| 22:5 $n$ -3              | 3.16 $\pm$ 0.29  | 2.57 $\pm$ 0.58  | 2.24 $\pm$ 0.01  | 3.23 $\pm$ 0.33               | 2.48 $\pm$ 0.15               | 2.72 $\pm$ 0.01               | 2.02 $\pm$ 0.02               | 2.29 $\pm$ 0.21                | 2.03 $\pm$ 0.04                | 2.95 $\pm$ 0.10 <sup>a</sup>   | 2.53 $\pm$ 0.05 <sup>b</sup>  | 2.49 $\pm$ 0.09 <sup>b</sup>  | 1.93 $\pm$ 0.11               | 1.71 $\pm$ 0.19               |
| 22:6 $n$ -3              | 24.32 $\pm$ 0.83 | 30.42 $\pm$ 1.94 | 28.28 $\pm$ 1.85 | 23.00 $\pm$ 0.41 <sup>a</sup> | 20.48 $\pm$ 0.24 <sup>b</sup> | 19.86 $\pm$ 0.64 <sup>b</sup> | 18.35 $\pm$ 0.32 <sup>a</sup> | 14.15 $\pm$ 0.64 <sup>b</sup>  | 15.58 $\pm$ 0.08 <sup>b</sup>  | 20.66 $\pm$ 0.64 <sup>a</sup>  | 17.40 $\pm$ 0.65 <sup>b</sup> | 22.42 $\pm$ 0.65 <sup>a</sup> | 19.43 $\pm$ 1.90              | 17.14 $\pm$ 1.31              |
| $\Sigma n$ -3PUFA        | 42.60 $\pm$ 0.80 | 46.11 $\pm$ 1.22 | 44.67 $\pm$ 1.19 | 40.16 $\pm$ 0.15 <sup>a</sup> | 38.41 $\pm$ 0.10 <sup>b</sup> | 37.62 $\pm$ 0.60 <sup>b</sup> | 33.02 $\pm$ 0.35 <sup>a</sup> | 29.27 $\pm$ 0.62 <sup>b</sup>  | 29.60 $\pm$ 0.73 <sup>ab</sup> | 35.75 $\pm$ 0.61 <sup>ab</sup> | 33.26 $\pm$ 1.12 <sup>a</sup> | 36.74 $\pm$ 0.20 <sup>b</sup> | 31.55 $\pm$ 1.51              | 29.00 $\pm$ 1.13              |

<sup>1</sup> F, P, and M represents female, pseudomale, and male, respectively.<sup>2</sup> Data within the same row and within a same fish batch not sharing a superscript letter were significantly ( $P < 0.05$ ) different.<sup>3</sup> There was not enough pseudomale in WF3 for the fatty acid analysis.<sup>4</sup> SFA, saturated fatty acids; MUFA, mono-unsaturated fatty acids; n-6PUFA, n-6 poly-unsaturated fatty acids; n-3 PUFA, n-3 poly-unsaturated fatty acid.



**Table S9.** The muscle fatty acid composition of experimental fish (%TFA, mean  $\pm$  standard error).

| Fatty acid        | HD               |                  |                  | RZ                            |                                |                               | WF1                          |                              |                              | WF2                           |                               |                               | WF3              |                  |
|-------------------|------------------|------------------|------------------|-------------------------------|--------------------------------|-------------------------------|------------------------------|------------------------------|------------------------------|-------------------------------|-------------------------------|-------------------------------|------------------|------------------|
|                   | F                | P                | M                | F                             | P                              | M                             | F                            | P                            | M                            | F                             | P                             | M                             | F                | P                |
| 14:0              | 4.30 $\pm$ 0.31  | 3.31 $\pm$ 0.11  | 4.04 $\pm$ 0.65  | 5.11 $\pm$ 0.14 <sup>a</sup>  | 4.78 $\pm$ 0.10 <sup>ab</sup>  | 4.31 $\pm$ 0.27 <sup>b</sup>  | 4.07 $\pm$ 0.49              | 4.76 $\pm$ 0.07              | 4.52 $\pm$ 0.10              | 3.91 $\pm$ 0.06               | 3.89 $\pm$ 0.04               | 3.80 $\pm$ 0.08               | 2.99 $\pm$ 0.08  | 2.94 $\pm$ 0.21  |
| 16:0              | 21.3 $\pm$ 0.73  | 23.84 $\pm$ 0.19 | 22.54 $\pm$ 0.96 | 19.19 $\pm$ 0.34 <sup>a</sup> | 20.23 $\pm$ 0.23 <sup>ab</sup> | 21.01 $\pm$ 0.08 <sup>b</sup> | 20.46 $\pm$ 0.19             | 20.4 $\pm$ 0.32              | 19.66 $\pm$ 0.76             | 20.64 $\pm$ 0.25              | 20.63 $\pm$ 0.23              | 21.21 $\pm$ 0.49              | 20.62 $\pm$ 0.02 | 21.65 $\pm$ 0.29 |
| 18:0              | 4.22 $\pm$ 0.61  | 7.60 $\pm$ 0.27  | 5.59 $\pm$ 1.38  | 3.14 $\pm$ 0.14               | 2.96 $\pm$ 0.23                | 3.73 $\pm$ 0.24               | 3.28 $\pm$ 0.02 <sup>a</sup> | 2.83 $\pm$ 0.06 <sup>b</sup> | 3.19 $\pm$ 0.09 <sup>a</sup> | 3.03 $\pm$ 0.12 <sup>ab</sup> | 2.91 $\pm$ 0.05 <sup>a</sup>  | 3.35 $\pm$ 0.08 <sup>b</sup>  | 5.14 $\pm$ 0.40  | 5.04 $\pm$ 0.37  |
| $\Sigma$ SFA      | 29.82 $\pm$ 1.07 | 34.75 $\pm$ 0.35 | 32.18 $\pm$ 1.70 | 27.45 $\pm$ 0.57              | 27.96 $\pm$ 0.34               | 29.05 $\pm$ 0.06              | 27.81 $\pm$ 0.29             | 27.99 $\pm$ 0.41             | 27.37 $\pm$ 0.80             | 27.58 $\pm$ 0.17              | 27.43 $\pm$ 0.27              | 28.36 $\pm$ 0.44              | 28.75 $\pm$ 0.38 | 29.63 $\pm$ 0.15 |
| 16:1 $n$ -7       | 8.71 $\pm$ 0.77  | 5.70 $\pm$ 0.25  | 6.30 $\pm$ 0.98  | 7.10 $\pm$ 0.26               | 7.56 $\pm$ 0.55                | 6.02 $\pm$ 0.48               | 5.92 $\pm$ 0.18              | 6.23 $\pm$ 0.12              | 5.91 $\pm$ 0.09              | 6.30 $\pm$ 0.10               | 6.42 $\pm$ 0.14               | 6.32 $\pm$ 0.13               | 4.75 $\pm$ 0.25  | 4.52 $\pm$ 0.43  |
| 17:1 $n$ -7       | 0.30 $\pm$ 0.04  | 0.41 $\pm$ 0.04  | 0.35 $\pm$ 0.06  | 0.48 $\pm$ 0.02 <sup>a</sup>  | 0.41 $\pm$ 0.01 <sup>ab</sup>  | 0.37 $\pm$ 0.03 <sup>b</sup>  | 0.41 $\pm$ 0.02              | 0.32 $\pm$ 0.03              | 0.31 $\pm$ 0.07              | 0.37 $\pm$ 0.01               | 0.37 $\pm$ 0.00               | 0.37 $\pm$ 0.01               | 0.33 $\pm$ 0.09  | 0.33 $\pm$ 0.10  |
| 18:1 $n$ -9c      | 13.23 $\pm$ 0.35 | 12.73 $\pm$ 0.49 | 12.97 $\pm$ 0.52 | 13.73 $\pm$ 0.42              | 14.61 $\pm$ 0.44               | 13.77 $\pm$ 0.33              | 17.02 $\pm$ 0.65             | 18.53 $\pm$ 0.42             | 18.80 $\pm$ 0.29             | 19.64 $\pm$ 0.11              | 19.73 $\pm$ 0.17              | 19.71 $\pm$ 0.2               | 16.08 $\pm$ 0.34 | 16.26 $\pm$ 0.36 |
| $\Sigma$ MUFA     | 22.77 $\pm$ 0.99 | 19.23 $\pm$ 0.19 | 20.14 $\pm$ 0.77 | 21.98 $\pm$ 0.49              | 23.14 $\pm$ 0.89               | 20.71 $\pm$ 0.23              | 23.34 $\pm$ 0.77             | 25.08 $\pm$ 0.47             | 25.02 $\pm$ 0.33             | 26.31 $\pm$ 0.08              | 26.52 $\pm$ 0.22              | 26.40 $\pm$ 0.15              | 21.16 $\pm$ 0.56 | 21.11 $\pm$ 0.7  |
| 18:2 $n$ -6c      | 3.78 $\pm$ 0.14  | 4.17 $\pm$ 0.15  | 3.99 $\pm$ 0.08  | 3.70 $\pm$ 0.11               | 3.55 $\pm$ 0.05                | 3.54 $\pm$ 0.08               | 15.20 $\pm$ 0.19             | 14.64 $\pm$ 0.21             | 15.18 $\pm$ 0.45             | 14.14 $\pm$ 0.34 <sup>a</sup> | 13.42 $\pm$ 0.14 <sup>a</sup> | 12.29 $\pm$ 0.14 <sup>b</sup> | 16.51 $\pm$ 0.46 | 14.65 $\pm$ 0.77 |
| 20:4 $n$ -6       | 0.15 $\pm$ 0.00  | 0.14 $\pm$ 0.03  | 0.14 $\pm$ 0.01  | 0.14 $\pm$ 0.01               | 0.12 $\pm$ 0.02                | 0.14 $\pm$ 0.02               | 0.13 $\pm$ 0.01              | 0.08 $\pm$ 0.01              | 0.09 $\pm$ 0.02              | 0.09 $\pm$ 0.01               | 0.09 $\pm$ 0.01               | 0.10 $\pm$ 0.00               | 0.13 $\pm$ 0.02  | 0.11 $\pm$ 0.00  |
| $\Sigma n$ -6PUFA | 3.93 $\pm$ 0.14  | 4.31 $\pm$ 0.18  | 4.13 $\pm$ 0.09  | 3.84 $\pm$ 0.12               | 3.67 $\pm$ 0.05                | 3.69 $\pm$ 0.09               | 15.34 $\pm$ 0.20             | 14.72 $\pm$ 0.2              | 15.27 $\pm$ 0.47             | 14.23 $\pm$ 0.34 <sup>a</sup> | 13.51 $\pm$ 0.15 <sup>a</sup> | 12.39 $\pm$ 0.14 <sup>b</sup> | 16.64 $\pm$ 0.45 | 14.76 $\pm$ 0.77 |
| 18:3 $n$ -3       | 1.13 $\pm$ 0.01  | 0.79 $\pm$ 0.23  | 0.99 $\pm$ 0.21  | 1.76 $\pm$ 0.05               | 1.75 $\pm$ 0.03                | 1.66 $\pm$ 0.04               | 1.80 $\pm$ 0.12              | 1.90 $\pm$ 0.02              | 1.89 $\pm$ 0.07              | 1.75 $\pm$ 0.03 <sup>a</sup>  | 1.54 $\pm$ 0.00 <sup>b</sup>  | 1.38 $\pm$ 0.05 <sup>c</sup>  | 1.72 $\pm$ 0.13  | 1.62 $\pm$ 0.10  |
| 20:3 $n$ -3       | 0.79 $\pm$ 0.08  | 1.27 $\pm$ 0.02  | 0.99 $\pm$ 0.18  | 0.84 $\pm$ 0.05               | 0.79 $\pm$ 0.06                | 0.88 $\pm$ 0.03               | 0.61 $\pm$ 0.06              | 0.50 $\pm$ 0.01              | 0.50 $\pm$ 0.03              | 0.53 $\pm$ 0.01 <sup>a</sup>  | 0.58 $\pm$ 0.03 <sup>ab</sup> | 0.65 $\pm$ 0.01 <sup>b</sup>  | 0.97 $\pm$ 0.07  | 0.94 $\pm$ 0.06  |
| 20:5 $n$ -3       | 9.18 $\pm$ 0.20  | 8.67 $\pm$ 0.95  | 8.42 $\pm$ 0.20  | 6.91 $\pm$ 0.34               | 7.20 $\pm$ 0.34                | 7.55 $\pm$ 0.16               | 6.19 $\pm$ 0.03              | 5.94 $\pm$ 0.17              | 6.09 $\pm$ 0.05              | 5.77 $\pm$ 0.02               | 5.85 $\pm$ 0.18               | 5.94 $\pm$ 0.20               | 4.98 $\pm$ 0.09  | 5.34 $\pm$ 0.15  |
| 22:5 $n$ -3       | 2.90 $\pm$ 0.12  | 3.04 $\pm$ 0.45  | 2.76 $\pm$ 0.15  | 4.01 $\pm$ 0.14               | 3.58 $\pm$ 0.16                | 3.61 $\pm$ 0.08               | 2.51 $\pm$ 0.20              | 2.40 $\pm$ 0.17              | 2.17 $\pm$ 0.09              | 2.33 $\pm$ 0.13 <sup>a</sup>  | 2.85 $\pm$ 0.07 <sup>b</sup>  | 2.77 $\pm$ 0.12 <sup>ab</sup> | 2.56 $\pm$ 0.28  | 2.20 $\pm$ 0.15  |
| 22:6 $n$ -3       | 16.22 $\pm$ 0.71 | 18.56 $\pm$ 0.78 | 17.93 $\pm$ 0.58 | 15.82 $\pm$ 0.48              | 14.76 $\pm$ 0.28               | 16.15 $\pm$ 0.13              | 9.61 $\pm$ 0.40              | 9.17 $\pm$ 0.21              | 9.19 $\pm$ 0.29              | 9.51 $\pm$ 0.36               | 9.92 $\pm$ 0.18               | 10.25 $\pm$ 0.24              | 12.56 $\pm$ 0.46 | 12.47 $\pm$ 0.70 |
| $\Sigma n$ -3PUFA | 30.22 $\pm$ 1.05 | 32.33 $\pm$ 0.83 | 31.10 $\pm$ 0.26 | 29.34 $\pm$ 0.69              | 28.07 $\pm$ 0.64               | 29.85 $\pm$ 0.07              | 20.72 $\pm$ 0.52             | 19.92 $\pm$ 0.23             | 19.85 $\pm$ 0.39             | 19.89 $\pm$ 0.22              | 20.75 $\pm$ 0.37              | 21.00 $\pm$ 0.53              | 22.77 $\pm$ 0.70 | 22.56 $\pm$ 0.83 |

<sup>1</sup> F, P, and M represents female, pseudomale, and male, respectively.

<sup>2</sup> Data within the same row and within a same fish batch not sharing a superscript letter were significantly ( $P < 0.05$ ) different.

<sup>3</sup> There was not enough pseudomale in WF3 for the fatty acid analysis.

<sup>4</sup> SFA, saturated fatty acids; MUFA, mono-unsaturated fatty acids; n-6PUFA, n-6 poly-unsaturated fatty acids; n-3 PUFA, n-3 poly-unsaturated fatty acid.

**Table S10.** The gonad fatty acid composition of experimental fish (%TFA, mean  $\pm$  standard error).

| Fatty acid          | HD                            |                                |                               | RZ                            |                               |                               | WF1                           |                               |                               | WF2                           |                               |                               | WF3                           |                              |
|---------------------|-------------------------------|--------------------------------|-------------------------------|-------------------------------|-------------------------------|-------------------------------|-------------------------------|-------------------------------|-------------------------------|-------------------------------|-------------------------------|-------------------------------|-------------------------------|------------------------------|
|                     | F                             | P                              | M                             | F                             | P                             | M                             | F                             | P                             | M                             | F                             | P                             | M                             | F                             | M                            |
| 14:0                | 2.27 $\pm$ 0.15               | 1.70 $\pm$ 0.30                | 1.50 $\pm$ 0.14               | 2.50 $\pm$ 0.60               | 1.73 $\pm$ 0.13               | 1.76 $\pm$ 0.12               | 1.65 $\pm$ 0.13               | 1.21 $\pm$ 0.07               | 1.30 $\pm$ 0.09               | 1.82 $\pm$ 0.11 <sup>a</sup>  | 1.59 $\pm$ 0.20 <sup>ab</sup> | 1.17 $\pm$ 0.06 <sup>b</sup>  | 1.31 $\pm$ 0.12               | 1.24 $\pm$ 0.17              |
| 16:0                | 19.01 $\pm$ 0.04 <sup>a</sup> | 24.02 $\pm$ 1.15 <sup>b</sup>  | 25.14 $\pm$ 1.45 <sup>b</sup> | 19.57 $\pm$ 0.68              | 20.48 $\pm$ 0.56              | 20.21 $\pm$ 0.76              | 20.29 $\pm$ 0.11              | 20.63 $\pm$ 1.02              | 21.75 $\pm$ 0.28              | 21.49 $\pm$ 0.09              | 22.28 $\pm$ 0.66              | 22.72 $\pm$ 0.15              | 21.66 $\pm$ 0.33              | 24.20 $\pm$ 1.54             |
| 18:0                | 8.46 $\pm$ 0.24 <sup>a</sup>  | 11.6 $\pm$ 0.39 <sup>b</sup>   | 12.19 $\pm$ 0.01 <sup>b</sup> | 7.88 $\pm$ 1.47               | 9.95 $\pm$ 0.39               | 9.42 $\pm$ 0.66               | 9.91 $\pm$ 0.59               | 8.83 $\pm$ 0.23               | 10.00 $\pm$ 0.43              | 9.60 $\pm$ 0.36               | 9.19 $\pm$ 0.19               | 9.00 $\pm$ 0.14               | 9.91 $\pm$ 0.58               | 8.60 $\pm$ 0.42              |
| $\Sigma$ SFA        | 29.73 $\pm$ 0.15 <sup>a</sup> | 37.31 $\pm$ 1.30 <sup>b</sup>  | 38.83 $\pm$ 1.6 <sup>b</sup>  | 29.94 $\pm$ 1.61              | 32.16 $\pm$ 0.76              | 31.38 $\pm$ 0.23              | 31.84 $\pm$ 0.47              | 30.67 $\pm$ 1.04              | 33.05 $\pm$ 0.06              | 32.90 $\pm$ 0.48              | 33.05 $\pm$ 0.75              | 32.89 $\pm$ 0.14              | 32.88 $\pm$ 0.34              | 34.04 $\pm$ 1.25             |
| 16:1 $n$ -7         | 5.14 $\pm$ 0.53               | 3.17 $\pm$ 0.86                | 2.43 $\pm$ 0.13               | 3.99 $\pm$ 0.79               | 2.48 $\pm$ 0.23               | 2.18 $\pm$ 0.06               | 2.78 $\pm$ 0.09 <sup>a</sup>  | 1.51 $\pm$ 0.19 <sup>b</sup>  | 1.45 $\pm$ 0.03 <sup>b</sup>  | 2.78 $\pm$ 0.07 <sup>a</sup>  | 1.51 $\pm$ 0.24 <sup>b</sup>  | 1.20 $\pm$ 0.11 <sup>b</sup>  | 2.00 $\pm$ 0.18 <sup>a</sup>  | 1.14 $\pm$ 0.11 <sup>b</sup> |
| 17:1 $n$ -7         | 0.84 $\pm$ 0.04               | 0.82 $\pm$ 0.01                | 0.70 $\pm$ 0.02               | 0.73 $\pm$ 0.11               | 0.57 $\pm$ 0.03               | 0.51 $\pm$ 0.03               | 0.49 $\pm$ 0.08               | 0.54 $\pm$ 0.07               | 0.74 $\pm$ 0.06               | 0.61 $\pm$ 0.05 <sup>a</sup>  | 0.56 $\pm$ 0.05 <sup>a</sup>  | 0.82 $\pm$ 0.03 <sup>b</sup>  | 0.41 $\pm$ 0.05               | 0.40 $\pm$ 0.030             |
| 18:1 $n$ -9c        | 10.38 $\pm$ 0.17              | 10.37 $\pm$ 0.38               | 11.39 $\pm$ 0.59              | 12.12 $\pm$ 0.33 <sup>a</sup> | 9.59 $\pm$ 0.14 <sup>b</sup>  | 8.80 $\pm$ 0.32 <sup>b</sup>  | 10.89 $\pm$ 0.49 <sup>a</sup> | 8.34 $\pm$ 0.60 <sup>b</sup>  | 8.75 $\pm$ 0.34 <sup>ab</sup> | 11.77 $\pm$ 0.19 <sup>a</sup> | 9.59 $\pm$ 0.66 <sup>b</sup>  | 7.69 $\pm$ 0.17 <sup>c</sup>  | 10.69 $\pm$ 0.60 <sup>a</sup> | 7.66 $\pm$ 0.51 <sup>b</sup> |
| $\Sigma$ MUFA       | 16.36 $\pm$ 0.68              | 14.35 $\pm$ 1.04               | 14.53 $\pm$ 0.48              | 16.84 $\pm$ 1.01 <sup>a</sup> | 12.64 $\pm$ 0.39 <sup>b</sup> | 11.49 $\pm$ 0.36 <sup>b</sup> | 14.17 $\pm$ 0.53 <sup>a</sup> | 10.38 $\pm$ 0.84 <sup>b</sup> | 10.94 $\pm$ 0.32 <sup>b</sup> | 15.17 $\pm$ 0.26 <sup>a</sup> | 11.67 $\pm$ 0.87 <sup>b</sup> | 9.70 $\pm$ 0.31 <sup>b</sup>  | 13.10 $\pm$ 0.84 <sup>a</sup> | 9.20 $\pm$ 0.57 <sup>b</sup> |
| 18:2 $n$ -6c        | 3.11 $\pm$ 0.03               | 4.84 $\pm$ 0.66                | 5.09 $\pm$ 0.17               | 3.72 $\pm$ 0.11               | 3.56 $\pm$ 0.23               | 3.99 $\pm$ 0.28               | 13.16 $\pm$ 0.37              | 14.17 $\pm$ 0.83              | 13.05 $\pm$ 0.05              | 12.00 $\pm$ 0.26              | 12.81 $\pm$ 0.37              | 13.08 $\pm$ 0.28              | 15.92 $\pm$ 0.11              | 14.81 $\pm$ 1.33             |
| 20:4 $n$ -6         | 0.28 $\pm$ 0.01 <sup>a</sup>  | 0.23 $\pm$ 0.02 <sup>ab</sup>  | 0.16 $\pm$ 0.01 <sup>b</sup>  | 0.20 $\pm$ 0.03               | 0.26 $\pm$ 0.02               | 0.19 $\pm$ 0.03               | 0.17 $\pm$ 0.04 <sup>ab</sup> | 0.22 $\pm$ 0.02 <sup>a</sup>  | 0.08 $\pm$ 0.03 <sup>b</sup>  | 0.33 $\pm$ 0.01 <sup>a</sup>  | 0.24 $\pm$ 0.00 <sup>b</sup>  | 0.20 $\pm$ 0.01 <sup>c</sup>  | 0.35 $\pm$ 0.00 <sup>a</sup>  | 0.12 $\pm$ 0.01 <sup>b</sup> |
| $\Sigma$ $n$ -6PUFA | 3.39 $\pm$ 0.04               | 5.07 $\pm$ 0.68                | 5.25 $\pm$ 0.16               | 3.92 $\pm$ 0.09               | 3.82 $\pm$ 0.25               | 4.17 $\pm$ 0.26               | 13.33 $\pm$ 0.34              | 14.40 $\pm$ 0.82              | 13.13 $\pm$ 0.09              | 12.33 $\pm$ 0.26              | 13.05 $\pm$ 0.37              | 13.28 $\pm$ 0.28              | 16.27 $\pm$ 0.11              | 14.93 $\pm$ 1.33             |
| 18:3 $n$ -3         | 0.62 $\pm$ 0.03               | 0.49 $\pm$ 0.06                | 0.70 $\pm$ 0.09               | 0.96 $\pm$ 0.20               | 0.55 $\pm$ 0.03               | 0.55 $\pm$ 0.02               | 0.91 $\pm$ 0.14 <sup>a</sup>  | 0.51 $\pm$ 0.02 <sup>ab</sup> | 0.46 $\pm$ 0.00 <sup>b</sup>  | 0.63 $\pm$ 0.03 <sup>a</sup>  | 0.44 $\pm$ 0.07 <sup>b</sup>  | 0.40 $\pm$ 0.01 <sup>b</sup>  | 0.63 $\pm$ 0.03               | 0.53 $\pm$ 0.08              |
| 20:3 $n$ -3         | 1.87 $\pm$ 0.07               | 2.62 $\pm$ 0.29                | 2.47 $\pm$ 0.12               | 1.95 $\pm$ 0.28               | 2.41 $\pm$ 0.09               | 2.28 $\pm$ 0.11               | 2.06 $\pm$ 0.16               | 1.89 $\pm$ 0.06               | 2.29 $\pm$ 0.06               | 2.61 $\pm$ 0.09 <sup>a</sup>  | 2.66 $\pm$ 0.14 <sup>a</sup>  | 3.20 $\pm$ 0.12 <sup>b</sup>  | 2.94 $\pm$ 0.2                | 3.05 $\pm$ 0.17              |
| 20:5 $n$ -3         | 10.79 $\pm$ 0.24 <sup>a</sup> | 7.82 $\pm$ 0.62 <sup>b</sup>   | 6.69 $\pm$ 0.58 <sup>b</sup>  | 8.51 $\pm$ 0.64               | 9.92 $\pm$ 0.28               | 9.79 $\pm$ 0.75               | 7.47 $\pm$ 0.08               | 7.39 $\pm$ 0.64               | 6.61 $\pm$ 0.40               | 7.21 $\pm$ 0.07               | 6.49 $\pm$ 0.40               | 6.20 $\pm$ 0.58               | 4.71 $\pm$ 0.36               | 4.04 $\pm$ 0.21              |
| 22:5 $n$ -3         | 3.69 $\pm$ 0.13               | 3.51 $\pm$ 0.20                | 3.07 $\pm$ 0.12               | 4.47 $\pm$ 0.08               | 4.48 $\pm$ 0.03               | 4.53 $\pm$ 0.05               | 3.17 $\pm$ 0.02               | 3.62 $\pm$ 0.30               | 3.23 $\pm$ 0.02               | 3.64 $\pm$ 0.22               | 3.91 $\pm$ 0.39               | 4.05 $\pm$ 0.27               | 3.08 $\pm$ 0.35               | 2.83 $\pm$ 0.07              |
| 22:6 $n$ -3         | 18.01 $\pm$ 0.56              | 18.38 $\pm$ 0.68               | 17.95 $\pm$ 0.08              | 18.13 $\pm$ 0.25 <sup>a</sup> | 19.82 $\pm$ 0.45 <sup>b</sup> | 20.94 $\pm$ 0.27 <sup>b</sup> | 11.82 $\pm$ 0.31 <sup>a</sup> | 16.56 $\pm$ 0.76 <sup>b</sup> | 19.35 $\pm$ 0.83 <sup>b</sup> | 14.13 $\pm$ 0.45 <sup>a</sup> | 18.45 $\pm$ 1.06 <sup>b</sup> | 18.74 $\pm$ 0.83 <sup>b</sup> | 18.13 $\pm$ 0.79              | 20.83 $\pm$ 0.80             |
| $\Sigma$ $n$ -3PUFA | 34.98 $\pm$ 0.52 <sup>a</sup> | 32.82 $\pm$ 0.46 <sup>ab</sup> | 30.87 $\pm$ 0.99 <sup>b</sup> | 34.02 $\pm$ 0.42 <sup>a</sup> | 37.19 $\pm$ 0.23 <sup>b</sup> | 38.08 $\pm$ 0.73 <sup>b</sup> | 25.43 $\pm$ 0.31 <sup>a</sup> | 29.97 $\pm$ 0.27 <sup>b</sup> | 31.95 $\pm$ 0.35 <sup>c</sup> | 28.23 $\pm$ 0.30 <sup>a</sup> | 31.95 $\pm$ 1.16 <sup>b</sup> | 32.60 $\pm$ 0.60 <sup>b</sup> | 29.49 $\pm$ 0.80              | 31.29 $\pm$ 0.72             |

<sup>1</sup> F, P, and M represents female, pseudomale, and male, respectively.

<sup>2</sup> Data within the same row and within a same fish batch not sharing a superscript letter were significantly ( $P<0.05$ ) different.

<sup>3</sup> There was not enough pseudomale in WF3 for the fatty acid analysis.

<sup>4</sup> SFA, saturated fatty acids; MUFA, mono-unsaturated fatty acids;  $n$ -6PUFA,  $n$ -6 poly-unsaturated fatty acids;  $n$ -3 PUFA,  $n$ -3 poly-unsaturated fatty acid.
